# Supplementary material for: Transcriptional Changes in Schistosoma mansoni during Early Schistosomula Development and in the Presence of Erythrocytes
Source: PLoS Negl Trop Dis. 2010 Feb 9;4(2):e600. doi: 10.1371/journal.pntd.0000600 (PMC2817720; doi:10.1371/journal.pntd.0000600)
Supplement: Table S4 — Genes encoding for secreted/membrane proteins that underwent ≥2-fold increased expression in each category. All genes that were up-regulated were screened for the presence of a signal peptide or anchor using SignalP; those ORFS with a signal peptide/anchor were then further screened for transmembrane (TM) domains using TMPred. (0.15 MB XLS) [file pntd.0000600.s004.xls]

## Sheet: Dev-upregulated-3hr
Systematic	3hr +RBC	5day +RBC	SS	TM	Protein Homology
Contig680_298	3447.35	321.69	38-39	1	89271365| CHK1 checkpoint homolog (S. pombe) [Xenopus tropicalis]
TC6882_676	20.35	143.91	20-21	1	>lcl|Smp_147730 ||29162.t000064, 29162.m001026|serine-type protease inhibitor, putative|Schistosoma mansoni|chr unknown01|||Auto
TC16552_150	17.89	10.23	22-23	2	256084401| heat shock protein [Schistosoma mansoni]
TC8169_721	15.75	16.72	33-34	1	>lcl|Smp_127810 ||29058.m001783|expressed protein|Schistosoma mansoni|chr unknown01|||Auto
TC7195_234	15.45	1.24	15-16	NIL	242012026| conserved hypothetical protein [Pediculus humanus corporis]
TC8169_615	14.45	16.46	33-34	1	>lcl|Smp_127810 ||29058.m001783|expressed protein|Schistosoma mansoni|chr unknown01|||Auto
TC16552_221	14.15	10.71	22-23	2	256084401| heat shock protein [Schistosoma mansoni]
Contig4907_694	14.07	12.04	22-23	1	56757777| SJCHGC04334 protein [Schistosoma japonicum]					314 unknowns
TC13560_946	11.12	29.3	22-23	2	>lcl|Smp_179420 ||30948.t000001, 30948.m000008|expressed protein|Schistosoma mansoni|chr unknown01|||Auto
TC7195_193	10.76	0.76	15-16	NIL	242012026| conserved hypothetical protein [Pediculus humanus corporis]
TC13586_1222	9.55	65.31	22-23	1	>lcl|Smp_067060 ||29256.m000193, 29256.t000007|cathepsin B-like peptidase (C01 family)|Schistosoma mansoni|chr unknown01|||Auto
TC13586_1262	7.21	32.46	22-23	1	>lcl|Smp_067060 ||29256.m000193, 29256.t000007|cathepsin B-like peptidase (C01 family)|Schistosoma mansoni|chr unknown01|||Auto
TC18037_387	7.17	2.73	37-38	1	>lcl|Smp_005500 ||29048.t000082, 29048.m001496|n-acetylgalactosaminyltransferase,putative|Schistosoma mansoni|chr unknown01|||Auto
TC17442_2010	6.97	25.98	27-28	6	>lcl|Smp_105410 ||31046.m000358, 31046.t000004|glucose transport protein, putative|Schistosoma mansoni|chr unknown02|||Auto
TC7335_61	6.95	10.09	29-30	1	>lcl|Smp_179360 ||30943.m000024, 30943.t000001|sortilin, putative|Schistosoma mansoni|chr unknown01||Partial|Auto
TC11644_693	6.52	12.49	22-23	6	256090178| N-methyl-D-aspartate receptor-associated protein [Schistosoma mansoni]
TC17159_1075	6.42	4.27	32-33	1	>lcl|Smp_158900 ||29261.t000017, 29261.m000429|hypothetical protein|Schistosoma mansoni|chr unknown01|||Auto
TC17159_1035	6.36	5.08	32-33	1	>lcl|Smp_158900 ||29261.t000017, 29261.m000429|hypothetical protein|Schistosoma mansoni|chr unknown01|||Auto
TC12477_696	6.22	1.26	24-25	2	1103831| elastase
TC7995_678	6.06	1	38-39	5	>lcl|Smp_170080 ||29449.t000023, 29449.m000429|sodium/dicarboxylatecotransporter-related|Schistosoma mansoni|chr unknown01|||Auto
TC16836_31	6.06	0.54	44-45	1	194036178| PREDICTED: hypothetical protein [Sus scrofa]
TC7405_390	6.03	282.94	23-24	1	>lcl|Smp_194860 ||29180.m000521, 29180.t000003|expressed protein|Schistosoma mansoni|chr unknown01|||Auto
TC7059_673	5.66	7.3	28-29	3	454258| unnamed protein product [Schistosoma mansoni]
TC7406_81	5.63	74.16	23-24	1	>lcl|Smp_194860 ||29180.m000521, 29180.t000003|expressed protein|Schistosoma mansoni|chr unknown01|||Auto
TC7415_2543	5.61	60.02	29-30	2	>lcl|Smp_011680.3 ||29060.t000038, 29060.m001209|CD36-like class B scavenger receptor|Schistosoma mansoni|chr unknown01|||Auto
TC7406_121	5.53	24.03	23-24	1	>lcl|Smp_194860 ||29180.m000521, 29180.t000003|expressed protein|Schistosoma mansoni|chr unknown01|||Auto
TC17442_1902	5.42	17.35	27-28	6	>lcl|Smp_105410 ||31046.m000358, 31046.t000004|glucose transport protein, putative|Schistosoma mansoni|chr unknown02|||Auto
TC17395_1087	5.37	94.12	26-27	1	>lcl|Smp_154760 ||29219.t000014, 29219.m000417|egf-like domain protein|Schistosoma mansoni|chr unknown01|||Auto
TC18228_1324	5.26	108.28	39-40	4	>lcl|Smp_093710 ||29584.m000192, 29584.t000009|hypothetical protein|Schistosoma mansoni|chr unknown01|||Auto
TC7995_638	5.21	0.79	38-39	5	>lcl|Smp_170080 ||29449.t000023, 29449.m000429|sodium/dicarboxylatecotransporter-related|Schistosoma mansoni|chr unknown01|||Auto
TC13965_635	5.02	7.21	17-18	2	>lcl|Smp_127820 ||29058.t000056, 29058.m001789|expressed protein|Schistosoma mansoni|chr unknown01|||Auto
TC17395_1127	4.85	72.7	26-27	1	>lcl|Smp_154760 ||29219.t000014, 29219.m000417|egf-like domain protein|Schistosoma mansoni|chr unknown01|||Auto
TC17338_734	4.83	24.87	35-36	7	>lcl|Smp_121930.1 ||48071.m000468, 48071.t000026|expressed protein|Schistosoma mansoni|chr unknown10|||Auto
TC17127_1198	4.7	7.94	22-23	1	>lcl|Smp_162770 ||29300.m000763|expressed protein|Schistosoma mansoni|chr unknown01|||Auto
TC7415_2370	4.67	45.31	29-30	2	>lcl|Smp_011680.3 ||29060.t000038, 29060.m001209|CD36-like class B scavenger receptor|Schistosoma mansoni|chr unknown01|||Auto
TC12487_498	4.63	2.34	35-36	1	256084283| hypothetical protein [Schistosoma mansoni]
TC13965_728	4.43	6.33	17-18	2	>lcl|Smp_127820 ||29058.t000056, 29058.m001789|expressed protein|Schistosoma mansoni|chr unknown01|||Auto
TC7405_215	4.42	277.26	23-24	1	>lcl|Smp_194860 ||29180.m000521, 29180.t000003|expressed protein|Schistosoma mansoni|chr unknown01|||Auto
TC9186_588	4.41	5.03	28-29	2	56753375| SJCHGC09422 protein [Schistosoma japonicum]
TC13531_684	4.33	3.65	23-24	1	>lcl|Smp_056460.1 ||29195.t000006, 29195.m000586|expressed protein|Schistosoma mansoni|chr unknown01|||Auto
TC9186_473	4.24	5.59	28-29	2	56753375| SJCHGC09422 protein [Schistosoma japonicum]
TC17338_694	4.1	19.76	35-36	7	>lcl|Smp_121930.1 ||48071.m000468, 48071.t000026|expressed protein|Schistosoma mansoni|chr unknown10|||Auto
TC17127_1156	4.08	7.35	22-23	1	>lcl|Smp_162770 ||29300.m000763|expressed protein|Schistosoma mansoni|chr unknown01|||Auto
TC16233_349	4.06	2.2	17-18	3	>lcl|Smp_173390 ||29582.m000162|ribosomal protein L5, putative|Schistosoma mansoni|chr unknown01|||Auto
TC14312_964	4.04	11.9	40-41	2	>lcl|Smp_054840 ||29186.t000042, 29186.m000897|DNA replication licensing factor MCM2, putative|Schistosoma mansoni|chr unknown01|||Auto
TC14387_855	4	6.26	18-19	2	>lcl|Smp_045360.4 ||29155.m000743, 29155.t000022|expressed protein|Schistosoma mansoni|chr unknown01|||Auto
TC19056_339	3.99	0.41	16-17	1	>lcl|Smp_173610 ||29595.m000185, 29595.t000001|expressed protein|Schistosoma mansoni|chr unknown01|||Auto
TC14847_413	3.99	9.34	34-35	4	>lcl|Smp_044750 ||29152.t000020, 29152.m000348|marvel-containing potential lipid raft-associated protein, putative|Schistosoma mansoni|chr unknown01|||Auto
TC7059_510	3.94	3.95	28-29	3	454258| unnamed protein product [Schistosoma mansoni]
TC9525_321	3.87	5.54	29-30	2	>lcl|Smp_006300 ||29050.t000054, 29050.m00975|hypothetical protein|Schistosoma mansoni|chr unknown01|||Auto
TC10628_535	3.84	2.9	14-15	NIL	4877954| Rho GTPase [Schistosoma mansoni]
TC12487_457	3.83	2.17	35-36	1	256084283| hypothetical protein [Schistosoma mansoni]
TC8011_926	3.79	4.73	28-29	1	256087674| integrin beta subunit [Schistosoma mansoni]
TC7598_1198	3.75	6.22	18-19	2	>lcl|Smp_045360.4 ||29155.m000743, 29155.t000022|expressed protein|Schistosoma mansoni|chr unknown01|||Auto
Contig3431_223	3.74	3.46	26-27	1	>lcl|12250_schisto-prots strictosidine synthase [EC4.3.3.2], putative|Auto
TC15390_723	3.71	4.62	17-18	1	>lcl|Smp_077880.2 ||29307.m000915, 29307.t000052|annexin, putative|Schistosoma mansoni|chr unknown01|||Auto
TC11013_414	3.7	16.92	16-17	1	>lcl|Smp_171190 ||29463.m00776|hypothetical protein|Schistosoma mansoni|chr unknown01|||Auto
TC14904_612	3.66	3.95	22-23	1	>lcl|Smp_144920 ||29143.m001856, 29143.t000015|expressed protein|Schistosoma mansoni|chr unknown01|||Auto
TC11644_543	3.65	5.47	22-23	6	256090178| N-methyl-D-aspartate receptor-associated protein [Schistosoma mansoni]
TC8011_865	3.52	3.87	28-29	1	256087674| integrin beta subunit [Schistosoma mansoni]
TC14312_1069	3.51	10.83	40-41	2	>lcl|Smp_054840 ||29186.t000042, 29186.m000897|DNA replication licensing factor MCM2, putative|Schistosoma mansoni|chr unknown01|||Auto
TC10729_700	3.46	2.22	30-31	6	>lcl|Smp_007730.2 ||29053.t000019, 29053.m001209|ER lumen protein retaining receptor, putative|Schistosoma mansoni|chr unknown01|||Auto
TC7391_1213	3.45	2.25	22-23	2	170581816| AMP-binding enzyme family protein [Brugia malayi]
TC17238_1051	3.4	4.76	32-33	2	>lcl|Smp_167170.1 ||29369.t000006, 29369.m000699|ancient ubiquitous protein, putative|Schistosoma mansoni|chr unknown01|||Auto
TC10630_410	3.39	1.92	29-30	NIL	56753153| SJCHGC05978 protein [Schistosoma japonicum]
Contig7316_999	3.38	6.44	22-23	2	>lcl|11490_schisto-prots protein disulfide-isomerase [EC5.3.4.1], putative|Auto
TC14387_815	3.37	5.42	18-19	2	>lcl|Smp_045360.4 ||29155.m000743, 29155.t000022|expressed protein|Schistosoma mansoni|chr unknown01|||Auto
TC19612_281	3.37	5.43	23-24	1	>lcl|Smp_172040 ||29472.m000467|unc-13 (munc13), putative|Schistosoma mansoni|chr unknown01||Partial|Auto
TC7696_508	3.37	19.92	18-19	7	>lcl|Smp_090220 ||29465.m000536, 29465.t000022|feline leukemia virus subgroup C receptor-related|Schistosoma mansoni|chr unknown01|||Auto
TC14368_704	3.36	3.36	16-17	2	>lcl|Smp_089670 ||29462.m000358, 29462.t000014|macroglobulin/complement,putative|Schistosoma mansoni|chr unknown01|||Auto
TC11930_541	3.36	4.97	26-27	1	256084719| alpha adaptin carboxyl-terminal domain [Schistosoma mansoni]
TC6882_798	3.33	18.28	20-21	1	>lcl|Smp_147730 ||29162.t000064, 29162.m001026|serine-type protease inhibitor, putative|Schistosoma mansoni|chr unknown01|||Auto
TC18500_21	3.26	4.8	15-16	3	>lcl|Smp_027040 ||29096.t000039, 29096.m000795|expressed protein|Schistosoma mansoni|chr unknown01|||Auto
TC14436_244	3.25	8	21-22	2	>lcl|Smp_152020 ||29192.t000007, 29192.m000564|expressed protein|Schistosoma mansoni|chr unknown01|||Auto
TC14429_1043	3.2	3.35	16-17	2	>lcl|Smp_089670 ||29462.m000358, 29462.t000014|macroglobulin/complement,putative|Schistosoma mansoni|chr unknown01|||Auto
TC12255_714	3.19	4.95	28-29	1	67625698| TPA: hypothetical protein [Schistosoma mansoni]
TC17238_1010	3.16	3.92	32-33	2	>lcl|Smp_167170.1 ||29369.t000006, 29369.m000699|ancient ubiquitous protein, putative|Schistosoma mansoni|chr unknown01|||Auto
TC15440_538	3.13	4.32	28-29	3	76154445| SJCHGC03394 protein [Schistosoma japonicum]
TC15390_609	3.09	3.85	17-18	1	>lcl|Smp_077880.2 ||29307.m000915, 29307.t000052|annexin, putative|Schistosoma mansoni|chr unknown01|||Auto
TC15193_683	3.05	7.81	28-29	7	76152857| SJCHGC02284 protein [Schistosoma japonicum]
TC8455_766	3.03	2.84	25-26	4	>lcl|Smp_041460 ||29142.t000047, 29142.m001451|tetraspanin D76 , putative|Schistosoma mansoni|chr unknown01|||Auto
TC14847_526	3.02	6.42	34-35	4	>lcl|Smp_044750 ||29152.t000020, 29152.m000348|marvel-containing potential lipid raft-associated protein, putative|Schistosoma mansoni|chr unknown01|||Auto
TC14699_565	2.99	4.94	23-24	1	>lcl|Smp_042910 ||29144.m002285, 29144.t000080|expressed protein|Schistosoma mansoni|chr unknown01|||Auto
TC15193_723	2.98	7.54	28-29	7	76152857| SJCHGC02284 protein [Schistosoma japonicum]
TC16808_244	2.97	5.14	25-26	NIL	>lcl|Smp_179180 ||30923.m000023, 30923.t000002|ribosomal protein S2, eukaryotic and archaeal form, putative|Schistosoma mansoni|chr unknown01|||Auto
TC13711_824	2.95	3.27	23-24	3	56754527| SJCHGC05480 protein [Schistosoma japonicum]
TC11930_470	2.94	4.64	26-27	1	256084719| alpha adaptin carboxyl-terminal domain [Schistosoma mansoni]
TC15221_922	2.92	4.99	29-30	3	256078024| hypothetical protein [Schistosoma mansoni]
TC16938_967	2.9	6.19	19-20	3	256070935| hypothetical protein [Schistosoma mansoni]
TC14429_1001	2.85	3.17	16-17	2	>lcl|Smp_089670 ||29462.m000358, 29462.t000014|macroglobulin/complement,putative|Schistosoma mansoni|chr unknown01|||Auto
TC14342_485	2.85	3.22	16-17	2	>lcl|Smp_089670 ||29462.m000358, 29462.t000014|macroglobulin/complement,putative|Schistosoma mansoni|chr unknown01|||Auto
TC17056_1488	2.83	0.16	45-46	1	>lcl|Smp_120050 ||47723.m000015, 47723.t000001|endoglycoceramidase,putative|Schistosoma mansoni|chr unknown10|||Auto
Contig8758_1537	2.82	2.27	18-19	NIL	>lcl|7438_schisto-prots resistance-associated overexpressed protein, putative|Auto
TC7378_756	2.81	0.18	24-25	3	>lcl|Smp_112090 ||37717.m000010, 37717.t000001|cercarial elastase (S01 family)|Schistosoma mansoni|chr unknown05|||Auto
TC12496_638	2.79	1.41	41-42	3	>lcl|Smp_173120 ||29559.t000004, 29559.m000054|phosphatidic acid phosphatase type 2-related|Schistosoma mansoni|chr unknown01|||Auto
TC12371_458	2.79	7.94	21-22	1	>lcl|Smp_027870 ||29099.t000003, 29099.m000889|hypothetical protein|Schistosoma mansoni|chr unknown01|||Auto
TC10568_2005	2.78	8.15	27-28	7	>lcl|Smp_103930.5 ||31017.t000006, 31017.m000140|glycosyltransferase,putative|Schistosoma mansoni|chr unknown01|||Auto
TC13086_620	2.78	6.97	23-24	2	76155694| SJCHGC03994 protein [Schistosoma japonicum]
TC7598_1374	2.75	5.05	18-19	2	>lcl|Smp_045360.4 ||29155.m000743, 29155.t000022|expressed protein|Schistosoma mansoni|chr unknown01|||Auto
TC11610_614	2.72	2.52	20-21	1	>lcl|Smp_068090 ||29263.m000458, 29263.t000017|zinc phosphodiesterase, putative|Schistosoma mansoni|chr unknown01|||Auto
TC14699_605	2.72	4.52	23-24	1	>lcl|Smp_042910 ||29144.m002285, 29144.t000080|expressed protein|Schistosoma mansoni|chr unknown01|||Auto
TC16703_497	2.72	6.6	25-26	3	256048746| hypothetical protein [Schistosoma mansoni]
TC11516_1329	2.72	1.79	31-32	4	226478792| Zinc finger protein 143 [Schistosoma japonicum]
TC10802_1613	2.7	1.62	37-38	1	226483531| hypothetical protein [Schistosoma japonicum]
TC11001_998	2.64	13.44	20-21	4	>lcl|Smp_094950 ||29616.m000294, 29616.t000002|smile protein, putative|Schistosoma mansoni|chr unknown01|||Auto
TC13086_571	2.64	7.05	23-24	2	76155694| SJCHGC03994 protein [Schistosoma japonicum]
Contig7267_761	2.63	1.9	19-20	NIL	>lcl|12105_schisto-prots to Signal recognition particle 68 kDa protein, putative|Auto
Contig8047_564	2.63	2.07	25-26	1	>lcl|3710_schisto-prots protein|Auto
TC10367_295	2.62	1.26	18-19	1	>lcl|Smp_128610 ||29061.m001251, 29061.t000025|cytochrome-c oxidase|Schistosoma mansoni|chr unknown01|||Auto
TC16703_298	2.62	8.22	25-26	3	256048746| hypothetical protein [Schistosoma mansoni]
TC16810_1653	2.61	5.18	14-15	1	>lcl|Smp_105680.1 ||31048.t000008, 31048.m000221|expressed protein|Schistosoma mansoni|chr unknown02|||Auto
Contig4421_648	2.6	1.07	15-16	3	>lcl|13354_schisto-prots expression-enhancing protein 1, putative|Auto
TC10729_558	2.57	2.43	30-31	6	>lcl|Smp_007730.2 ||29053.t000019, 29053.m001209|ER lumen protein retaining receptor, putative|Schistosoma mansoni|chr unknown01|||Auto
TC17362_728	2.57	4.03	26-27	1	>lcl|Smp_018760 ||29076.t000088, 29076.m001483|neutral alpha-glucosidase ab precursor (glucosidase II alpha subunit) (alpha glucosidase 2), putative|Schistosoma mansoni|chr unknown01|||Auto
TC19056_235	2.54	0.27	16-17	1	>lcl|Smp_173610 ||29595.m000185, 29595.t000001|expressed protein|Schistosoma mansoni|chr unknown01|||Auto
TC18130_572	2.54	4.07	14-15	5	256078800| oxalate:formate antiporter [Schistosoma mansoni]
TC16938_1013	2.54	3.93	19-20	3	256070935| hypothetical protein [Schistosoma mansoni]
TC17472_589	2.53	4.2	28-29	2	256073461| hypothetical protein [Schistosoma mansoni]
TC7378_796	2.51	0.14	24-25	3	>lcl|Smp_112090 ||37717.m000010, 37717.t000001|cercarial elastase (S01 family)|Schistosoma mansoni|chr unknown05|||Auto
TC10750_1810	2.51	5.08	17-18	1	256090238| arf gtpase-activating protein [Schistosoma mansoni]
TC14342_465	2.49	2.84	16-17	2	>lcl|Smp_089670 ||29462.m000358, 29462.t000014|macroglobulin/complement,putative|Schistosoma mansoni|chr unknown01|||Auto
TC14607_786	2.48	3.65	15-16	5	>lcl|Smp_054310 ||29185.m000861, 29185.t000006|S2P peptidase (M50 family)|Schistosoma mansoni|chr unknown01|||Auto
TC17056_1590	2.47	0.12	45-46	1	>lcl|Smp_120050 ||47723.m000015, 47723.t000001|endoglycoceramidase,putative|Schistosoma mansoni|chr unknown10|||Auto
TC10750_1666	2.46	4.75	17-18	1	256090238| arf gtpase-activating protein [Schistosoma mansoni]
TC14607_746	2.45	3.83	15-16	5	>lcl|Smp_054310 ||29185.m000861, 29185.t000006|S2P peptidase (M50 family)|Schistosoma mansoni|chr unknown01|||Auto
TC16113_761	2.45	27.64	18-19	1	>lcl|Smp_157070 ||29240.t000009, 29240.m000741|cysteine-rich with egf-like domains protein|Schistosoma mansoni|chr unknown01|||Auto
TC17472_759	2.45	4.42	28-29	2	256073461| hypothetical protein [Schistosoma mansoni]
TC16890_927	2.45	4.12	29-30	2	29840932| SJCHGC01749 protein [Schistosoma japonicum]
TC8238_551	2.43	1.93	19-20	6	>lcl|Smp_096780.2 ||29638.t000014, 29638.m000212|transmembrane protein htp-1 related|Schistosoma mansoni|chr unknown01|||Auto
TC7968_1658	2.41	4.18	32-33	NIL	>lcl|Smp_126600 ||29054.t000023, 29054.m001482|expressed protein|Schistosoma mansoni|chr unknown01|||Auto
TC19612_221	2.4	4.02	23-24	1	>lcl|Smp_172040 ||29472.m000467|unc-13 (munc13), putative|Schistosoma mansoni|chr unknown01||Partial|Auto
TC19410_421	2.4	2.24	23-24	NIL	256082013| hypothetical protein [Schistosoma mansoni]
TC18500_164	2.39	1.68	15-16	3	>lcl|Smp_027040 ||29096.t000039, 29096.m000795|expressed protein|Schistosoma mansoni|chr unknown01|||Auto
TC14436_204	2.39	5.62	21-22	2	>lcl|Smp_152020 ||29192.t000007, 29192.m000564|expressed protein|Schistosoma mansoni|chr unknown01|||Auto
TC7599_2825	2.38	4.16	24-25	6	>lcl|Smp_012440 ||29061.t000083, 29061.m001309|glucose transport protein, putative|Schistosoma mansoni|chr unknown01|||Auto
TC7599_2785	2.35	4.51	24-25	6	>lcl|Smp_012440 ||29061.t000083, 29061.m001309|glucose transport protein, putative|Schistosoma mansoni|chr unknown01|||Auto
TC13993_270	2.33	5.66	40-41	6	>lcl|Smp_095010 ||29616.m000302, 29616.t000010|phosphate transporter, putative|Schistosoma mansoni|chr unknown01|||Auto
TC17362_688	2.32	4.34	26-27	1	>lcl|Smp_018760 ||29076.t000088, 29076.m001483|neutral alpha-glucosidase ab precursor (glucosidase II alpha subunit) (alpha glucosidase 2), putative|Schistosoma mansoni|chr unknown01|||Auto
TC18438_566	2.32	2.3	36-37	2	76156068| SJCHGC05680 protein [Schistosoma japonicum]
TC11001_1038	2.31	10.98	20-21	4	>lcl|Smp_094950 ||29616.m000294, 29616.t000002|smile protein, putative|Schistosoma mansoni|chr unknown01|||Auto
TC16890_971	2.31	3.86	29-30	2	29840932| SJCHGC01749 protein [Schistosoma japonicum]
TC11516_1289	2.31	1.43	31-32	4	226478792| Zinc finger protein 143 [Schistosoma japonicum]
TC16839_849	2.29	0.43	23-24	1	>lcl|Smp_116650 ||43729.m000007, 43729.t000001|expressed protein|Schistosoma mansoni|chr unknown08|||Auto
TC13711_932	2.28	3.35	23-24	3	56754527| SJCHGC05480 protein [Schistosoma japonicum]
TC12516_628	2.27	1.35	19-20	NIL	>lcl|Smp_098090 ||29655.t000008, 29655.m000225|expressed protein|Schistosoma mansoni|chr unknown01|||Auto
Contig5875_602	2.27	2.32	26-27	1	>lcl|11176_schisto-prots protein phosphatase [EC3.1.3.16], putative|Auto
TC17514_883	2.27	4.82	16-17	1	>lcl|Smp_041370 ||29142.t000035, 29142.m001439|expressed protein|Schistosoma mansoni|chr unknown01|||Auto
Contig8732_1035	2.27	6.31	25-26	2	>lcl|12815_schisto-prots type B, 2;IPR008139,Saposin B;IPR011001,Saposin-like,domain-containing|Auto
TC19410_461	2.27	2.1	23-24	NIL	256082013| hypothetical protein [Schistosoma mansoni]
TC11406_1548	2.26	4.29	29-30	4	76154134| SJCHGC06228 protein [Schistosoma japonicum]
TC15913_465	2.23	2.97	25-26	4	>lcl|Smp_041460 ||29142.t000047, 29142.m001451|tetraspanin D76 , putative|Schistosoma mansoni|chr unknown01|||Auto
TC13129_448	2.23	5.96	17-18	2	256074534| hypothetical protein [Schistosoma mansoni]
TC15897_645	2.22	5.83	25-26	6	>lcl|Smp_134080 ||29083.t000051, 29083.m000965|inositol transporter|Schistosoma mansoni|chr unknown01|||Auto
TC18130_532	2.22	4.15	14-15	5	256078800| oxalate:formate antiporter [Schistosoma mansoni]
TC12144_31	2.22	3.47	24-25	3	256085379| hypothetical protein [Schistosoma mansoni]
TC18771_817	2.21	4.17	18-19	2	>lcl|Smp_073280 ||29293.m000875, 29293.t000055|expressed protein|Schistosoma mansoni|chr unknown01|||Auto
TC16808_852	2.19	3.07	25-26	NIL	>lcl|Smp_179180 ||30923.m000023, 30923.t000002|ribosomal protein S2, eukaryotic and archaeal form, putative|Schistosoma mansoni|chr unknown01|||Auto
TC13993_310	2.19	4.62	40-41	6	>lcl|Smp_095010 ||29616.m000302, 29616.t000010|phosphate transporter, putative|Schistosoma mansoni|chr unknown01|||Auto
TC18771_675	2.17	4.54	18-19	2	>lcl|Smp_073280 ||29293.m000875, 29293.t000055|expressed protein|Schistosoma mansoni|chr unknown01|||Auto
TC14792_1209	2.16	2.76	25-26	5	>lcl|Smp_090870 ||29469.m000422, 29469.t000002|protein transport protein Sec13, putative|Schistosoma mansoni|chr unknown01|||Auto
TC17766_639	2.15	7.45	21-22	1	>lcl|Smp_160830 ||29286.t000013, 29286.m000849|phospholipase d -related|Schistosoma mansoni|chr unknown01|||Auto
TC15545_350	2.15	0.7	41-42	2	256077126| DNA-directed RNA polymerase [Schistosoma mansoni]
TC12223_686	2.14	26.94	20-21	1	>lcl|Smp_192120 ||46501.t000001, 46501.m000009|cathepsin s, putative|Schistosoma mansoni|chr unknown09||Partial|Auto
TC11236_496	2.14	1.52	19-20	5	239744321| PREDICTED: hypothetical protein [Homo sapiens]
TC12683_407	2.14	1.44	15-16	3	109472441| PREDICTED: hypothetical protein [Rattus norvegicus]
TC14062_1407	2.13	1.8	22-23	7	>lcl|Smp_094660 ||29611.t000001, 29611.m000119|phosphate transporter, putative|Schistosoma mansoni|chr unknown01|||Auto
TC8455_726	2.12	1.97	25-26	4	>lcl|Smp_041460 ||29142.t000047, 29142.m001451|tetraspanin D76 , putative|Schistosoma mansoni|chr unknown01|||Auto
TC16925_2124	2.12	3.18	51-52	7	>lcl|Smp_164160 ||29307.t000045, 29307.m000908|tumor differentially expressed protein, putative|Schistosoma mansoni|chr unknown01|||Auto
TC17034_683	2.11	2.81	21-22	4	>lcl|Smp_000070 |slc1||1-acyl-sn-glycerol-3-phosphateo-acyltransferase|Schistosoma mansoni|chr unknown01|||Auto
TC10841_829	2.11	4.87	33-34	7	>lcl|Smp_158600 ||29259.m000467, 29259.t000001|oligosaccharyl transferase, putative|Schistosoma mansoni|chr unknown01|||Auto
TC7238_684	2.11	4.13	23-24	2	67625701| TPA: endonuclease-reverse transcriptase [Schistosoma mansoni]
TC7767_1157	2.11	2.22	37-38	3	256073366| prominin (prom) protein [Schistosoma mansoni]
TC16810_1768	2.1	4.14	14-15	1	>lcl|Smp_105680.1 ||31048.t000008, 31048.m000221|expressed protein|Schistosoma mansoni|chr unknown02|||Auto
TC7710_1269	2.1	10.27	42-43	1	>lcl|Smp_089240 ||29459.m000457, 29459.t000027|beta-1,2-n-acetylglucosaminyltransferase II, putative|Schistosoma mansoni|chr unknown01|||Auto
TC6922_925	2.1	3.22	15-16	4	256092282| hypothetical protein [Schistosoma mansoni]
TC11486_1028	2.07	5.64	23-24	1	>lcl|Smp_020210 ||29079.t000065, 29079.m002239|expressed protein|Schistosoma mansoni|chr unknown01|||Auto
TC16960_192	2.06	1.77	20-21	5	>lcl|Smp_102510 ||30909.m000045, 30909.t000002|peripheral-type benzodiazepine receptor, putative|Schistosoma mansoni|chr unknown01|||Auto
TC11034_588	2.06	3.71	28-29	2	>lcl|Smp_006060 ||29049.t000072, 29049.m001658|hypothetical protein|Schistosoma mansoni|chr unknown01|||Auto
TC16793_742	2.06	36.95	27-28	2	473159| cathepsin L [Schistosoma mansoni]
TC14339_874	2.04	2.72	27-28	1	>lcl|Smp_153390.2 ||29200.m000689, 29200.t000032|ectonucleotidepyrophosphatase/phosphodiesterase,putative|Schistosoma mansoni|chr unknown01|||Auto
TC16925_2079	2.04	2.73	51-52	7	>lcl|Smp_164160 ||29307.t000045, 29307.m000908|tumor differentially expressed protein, putative|Schistosoma mansoni|chr unknown01|||Auto
TC13708_1559	2.03	1.14	18-19	2	>lcl|Smp_032520.2 ||29113.t000043, 29113.m000743|lysosome-associated membrane glycoprotein, putative|Schistosoma mansoni|chr unknown01|||Auto
TC18504_384	2.03	3.82	17-18	1	>lcl|Smp_003340 ||29046.m002672, 29046.t000058|expressed protein|Schistosoma mansoni|chr unknown01|||Auto
TC11236_456	2.03	1.33	19-20	5	239744321| PREDICTED: hypothetical protein [Homo sapiens]
TC8238_511	2.02	1.61	19-20	6	>lcl|Smp_096780.2 ||29638.t000014, 29638.m000212|transmembrane protein htp-1 related|Schistosoma mansoni|chr unknown01|||Auto
TC16839_576	2.02	5.07	23-24	1	>lcl|Smp_116650 ||43729.m000007, 43729.t000001|expressed protein|Schistosoma mansoni|chr unknown08|||Auto
TC19281_457	2.01	0.81	27-28	2	239750932| PREDICTED: hypothetical protein [Homo sapiens]
TC14792_1161	2	2.37	25-26	5	>lcl|Smp_090870 ||29469.m000422, 29469.t000002|protein transport protein Sec13, putative|Schistosoma mansoni|chr unknown01|||Auto
TC10628_323	2	1.02	14-15	NIL	4877954| Rho GTPase [Schistosoma mansoni]

## Sheet: Dev-upregulated-5Day
Systematic	3hr +RBC	5day +RBC	SS	TM	Protein Homology
TC18051_669	1.26	1598.18	28-29	4	256086729| similar to tetraspanin TE736 [Schistosoma mansoni]
Contig680_298	3447.35	321.69	38-39	1	89271365| CHK1 checkpoint homolog (S. pombe) [Xenopus tropicalis]
TC7405_390	6.03	282.94	23-24	1	>lcl|Smp_194860 ||29180.m000521, 29180.t000003|expressed protein|Schistosoma mansoni|chr unknown01|||Auto
TC7405_215	4.42	277.26	23-24	1	>lcl|Smp_194860 ||29180.m000521, 29180.t000003|expressed protein|Schistosoma mansoni|chr unknown01|||Auto
TC14173_1677	1.51	151.62	30-31	1	>lcl|Smp_141680 ||29123.m000534, 29123.t000018|expressed protein|Schistosoma mansoni|chr unknown01|||Auto
TC6882_676	20.35	143.91	20-21	1	>lcl|Smp_147730 ||29162.t000064, 29162.m001026|serine-type protease inhibitor, putative|Schistosoma mansoni|chr unknown01|||Auto
TC18228_1324	5.26	108.28	39-40	4	>lcl|Smp_093710 ||29584.m000192, 29584.t000009|hypothetical protein|Schistosoma mansoni|chr unknown01|||Auto
TC17395_1087	5.37	94.12	26-27	1	>lcl|Smp_154760 ||29219.t000014, 29219.m000417|egf-like domain protein|Schistosoma mansoni|chr unknown01|||Auto
TC16843_783	0.55	82.44	24-25	2	>lcl|Smp_002150 ||29044.m001211, 29044.t000051|subfamily S1A unassigned peptidase (S01 family)|Schistosoma mansoni|chr unknown01|||Auto
TC7406_81	5.63	74.16	23-24	1	>lcl|Smp_194860 ||29180.m000521, 29180.t000003|expressed protein|Schistosoma mansoni|chr unknown01|||Auto
TC17395_1127	4.85	72.7	26-27	1	>lcl|Smp_154760 ||29219.t000014, 29219.m000417|egf-like domain protein|Schistosoma mansoni|chr unknown01|||Auto
TC13586_1222	9.55	65.31	22-23	1	>lcl|Smp_067060 ||29256.m000193, 29256.t000007|cathepsin B-like peptidase (C01 family)|Schistosoma mansoni|chr unknown01|||Auto
TC7415_2543	5.61	60.02	29-30	2	>lcl|Smp_011680.3 ||29060.t000038, 29060.m001209|CD36-like class B scavenger receptor|Schistosoma mansoni|chr unknown01|||Auto
TC16843_1243	0.54	58.9	24-25	2	>lcl|Smp_002150 ||29044.m001211, 29044.t000051|subfamily S1A unassigned peptidase (S01 family)|Schistosoma mansoni|chr unknown01|||Auto
TC10560_814	1.93	57.55	22-23	2	>lcl|Smp_141610 ||29122.t000021, 29122.m000373|SmCB2 peptidase (C01 family)|Schistosoma mansoni|chr unknown01|||Auto
TC10560_754	1.45	51.64	22-23	2	>lcl|Smp_141610 ||29122.t000021, 29122.m000373|SmCB2 peptidase (C01 family)|Schistosoma mansoni|chr unknown01|||Auto
TC7415_2370	4.67	45.31	29-30	2	>lcl|Smp_011680.3 ||29060.t000038, 29060.m001209|CD36-like class B scavenger receptor|Schistosoma mansoni|chr unknown01|||Auto
TC16793_742	2.06	36.95	27-28	2	473159| cathepsin L [Schistosoma mansoni]
TC13586_1262	7.21	32.46	22-23	1	>lcl|Smp_067060 ||29256.m000193, 29256.t000007|cathepsin B-like peptidase (C01 family)|Schistosoma mansoni|chr unknown01|||Auto
TC12166_788	1.21	29.36	20-21	2	>lcl|Smp_163970 ||29307.m000869|family S10 non-peptidase homologue (S10 family)|Schistosoma mansoni|chr unknown01|||Auto
TC13560_946	11.12	29.3	22-23	2	>lcl|Smp_179420 ||30948.t000001, 30948.m000008|expressed protein|Schistosoma mansoni|chr unknown01|||Auto
TC16113_761	2.45	27.64	18-19	1	>lcl|Smp_157070 ||29240.t000009, 29240.m000741|cysteine-rich with egf-like domains protein|Schistosoma mansoni|chr unknown01|||Auto
TC12223_686	2.14	26.94	20-21	1	>lcl|Smp_192120 ||46501.t000001, 46501.m000009|cathepsin s, putative|Schistosoma mansoni|chr unknown09||Partial|Auto
TC16793_541	1.6	26.82	27-28	2	473159| cathepsin L [Schistosoma mansoni]
TC17442_2010	6.97	25.98	27-28	6	>lcl|Smp_105410 ||31046.m000358, 31046.t000004|glucose transport protein, putative|Schistosoma mansoni|chr unknown02|||Auto
TC17736_451	1.32	25.47	27-28	2	>lcl|Smp_019350 ||29077.m002187, 29077.t000103|expressed protein|Schistosoma mansoni|chr unknown01|||Auto
TC17338_734	4.83	24.87	35-36	7	>lcl|Smp_121930.1 ||48071.m000468, 48071.t000026|expressed protein|Schistosoma mansoni|chr unknown10|||Auto
TC12223_638	1.79	24.78	20-21	1	>lcl|Smp_192120 ||46501.t000001, 46501.m000009|cathepsin s, putative|Schistosoma mansoni|chr unknown09||Partial|Auto
TC7406_121	5.53	24.03	23-24	1	>lcl|Smp_194860 ||29180.m000521, 29180.t000003|expressed protein|Schistosoma mansoni|chr unknown01|||Auto
TC12166_748	1.11	22.22	20-21	2	>lcl|Smp_163970 ||29307.m000869|family S10 non-peptidase homologue (S10 family)|Schistosoma mansoni|chr unknown01|||Auto
TC17736_330	1.23	21.06	27-28	2	>lcl|Smp_019350 ||29077.m002187, 29077.t000103|expressed protein|Schistosoma mansoni|chr unknown01|||Auto
TC7696_508	3.37	19.92	18-19	7	>lcl|Smp_090220 ||29465.m000536, 29465.t000022|feline leukemia virus subgroup C receptor-related|Schistosoma mansoni|chr unknown01|||Auto
TC17338_694	4.1	19.76	35-36	7	>lcl|Smp_121930.1 ||48071.m000468, 48071.t000026|expressed protein|Schistosoma mansoni|chr unknown10|||Auto
TC6882_798	3.33	18.28	20-21	1	>lcl|Smp_147730 ||29162.t000064, 29162.m001026|serine-type protease inhibitor, putative|Schistosoma mansoni|chr unknown01|||Auto
TC18934_664	1.36	18.14	44-45	6	56753856| SJCHGC03676 protein [Schistosoma japonicum]
TC17442_1902	5.42	17.35	27-28	6	>lcl|Smp_105410 ||31046.m000358, 31046.t000004|glucose transport protein, putative|Schistosoma mansoni|chr unknown02|||Auto
TC11013_414	3.7	16.92	16-17	1	>lcl|Smp_171190 ||29463.m00776|hypothetical protein|Schistosoma mansoni|chr unknown01|||Auto
TC8169_721	15.75	16.72	33-34	1	>lcl|Smp_127810 ||29058.m001783|expressed protein|Schistosoma mansoni|chr unknown01|||Auto
TC8169_615	14.45	16.46	33-34	1	>lcl|Smp_127810 ||29058.m001783|expressed protein|Schistosoma mansoni|chr unknown01|||Auto
TC8620_594	0.66	15.51	17-18	6	>lcl|Smp_160160 ||29278.m000592|sialin (solute carrier family 17 member 5) (sodium/sialic acid cotransporter) (ast) (membrane glycoprotein hp59), putative|Schistosoma mansoni|chr unknown01|||Auto
TC15219_257	1.71	15.15	22-23	1	>lcl|Smp_134250 ||29085.m001107, 29085.t000006|heparan sulfate n-deacetylase/n-sulfotransferase, putative|Schistosoma mansoni|chr unknown01|||Auto
TC14899_305	0.59	14.66	19-20	1	>lcl|Smp_130100 ||29066.t000030, 29066.m001154|saposin containing protein|Schistosoma mansoni|chr unknown01|||Auto
TC9324_666	1.3	13.82	20-21	1	>lcl|Smp_060570 ||29218.t000015, 29218.m000448|SARG904 , putative|Schistosoma mansoni|chr unknown01|||Auto
TC14899_265	0.56	13.54	19-20	1	>lcl|Smp_130100 ||29066.t000030, 29066.m001154|saposin containing protein|Schistosoma mansoni|chr unknown01|||Auto
TC11001_998	2.64	13.44	20-21	4	>lcl|Smp_094950 ||29616.m000294, 29616.t000002|smile protein, putative|Schistosoma mansoni|chr unknown01|||Auto
TC18677_406	1.93	12.86	17-18	2	>lcl|Smp_136730 ||29096.t000018, 29096.m000774|subfamily A1A unassigned peptidase (A01 family)|Schistosoma mansoni|chr unknown01|||Auto
TC11644_693	6.52	12.49	22-23	6	256090178| N-methyl-D-aspartate receptor-associated protein [Schistosoma mansoni]
Contig4907_694	14.07	12.04	22-23	1	56757777| SJCHGC04334 protein [Schistosoma japonicum]
TC14312_964	4.04	11.9	40-41	2	>lcl|Smp_054840 ||29186.t000042, 29186.m000897|DNA replication licensing factor MCM2, putative|Schistosoma mansoni|chr unknown01|||Auto
TC18677_367	1.91	11.52	17-18	2	>lcl|Smp_136730 ||29096.t000018, 29096.m000774|subfamily A1A unassigned peptidase (A01 family)|Schistosoma mansoni|chr unknown01|||Auto
Contig8499_1197	1.59	11.39	32-33	1	56754987| SJCHGC01753 protein [Schistosoma japonicum]
TC8620_537	0.45	11.22	17-18	6	>lcl|Smp_160160 ||29278.m000592|sialin (solute carrier family 17 member 5) (sodium/sialic acid cotransporter) (ast) (membrane glycoprotein hp59), putative|Schistosoma mansoni|chr unknown01|||Auto
TC11001_1038	2.31	10.98	20-21	4	>lcl|Smp_094950 ||29616.m000294, 29616.t000002|smile protein, putative|Schistosoma mansoni|chr unknown01|||Auto
TC14312_1069	3.51	10.83	40-41	2	>lcl|Smp_054840 ||29186.t000042, 29186.m000897|DNA replication licensing factor MCM2, putative|Schistosoma mansoni|chr unknown01|||Auto
TC16552_221	14.15	10.71	22-23	2	256084401| heat shock protein [Schistosoma mansoni]
TC7710_1269	2.1	10.27	42-43	1	>lcl|Smp_089240 ||29459.m000457, 29459.t000027|beta-1,2-n-acetylglucosaminyltransferase II, putative|Schistosoma mansoni|chr unknown01|||Auto
TC16552_150	17.89	10.23	22-23	2	256084401| heat shock protein [Schistosoma mansoni]
TC7335_61	6.95	10.09	29-30	1	>lcl|Smp_179360 ||30943.m000024, 30943.t000001|sortilin, putative|Schistosoma mansoni|chr unknown01||Partial|Auto
TC10838_1198	0.87	10.07	21-22	1	256082487| hypothetical protein [Schistosoma mansoni]
Contig7002_634	1.67	9.48	24-25	4	>lcl|11692_schisto-prots membrane glycoprotein (Lamp)/CD68,domain-containing|Auto
TC14847_413	3.99	9.34	34-35	4	>lcl|Smp_044750 ||29152.t000020, 29152.m000348|marvel-containing potential lipid raft-associated protein, putative|Schistosoma mansoni|chr unknown01|||Auto
TC14744_402	0.72	9.07	33-34	1	56758784| SJCHGC00969 protein [Schistosoma japonicum]
TC14744_627	0.85	8.81	33-34	1	56758784| SJCHGC00969 protein [Schistosoma japonicum]
TC16703_298	2.62	8.22	25-26	3	256048746| hypothetical protein [Schistosoma mansoni]
TC10568_2005	2.78	8.15	27-28	7	>lcl|Smp_103930.5 ||31017.t000006, 31017.m000140|glycosyltransferase,putative|Schistosoma mansoni|chr unknown01|||Auto
TC13551_2439	1.02	8.11	20-21	2	>lcl|Smp_030300.4 ||29104.m001893, 29104.t000113|endoplasmin, putative|Schistosoma mansoni|chr unknown01|||Auto
TC9859_934	1.04	8.08	33-34	4	>lcl|Smp_129820 ||29065.m000944|multidrug resistance protein 1 (ATP-binding cassette C1), putative|Schistosoma mansoni|chr unknown01|||Auto
TC14436_244	3.25	8	21-22	2	>lcl|Smp_152020 ||29192.t000007, 29192.m000564|expressed protein|Schistosoma mansoni|chr unknown01|||Auto
TC8040_431	1.38	7.99	19-20	2	>lcl|Smp_028870.3 ||29101.m000753, 29101.t000033|expressed protein|Schistosoma mansoni|chr unknown01|||Auto
TC12371_458	2.79	7.94	21-22	1	>lcl|Smp_027870 ||29099.t000003, 29099.m000889|hypothetical protein|Schistosoma mansoni|chr unknown01|||Auto
TC17127_1198	4.7	7.94	22-23	1	>lcl|Smp_162770 ||29300.m000763|expressed protein|Schistosoma mansoni|chr unknown01|||Auto
TC15193_683	3.05	7.81	28-29	7	76152857| SJCHGC02284 protein [Schistosoma japonicum]
TC16719_2653	1.04	7.54	18-19	3	256048746| hypothetical protein [Schistosoma mansoni]
TC15193_723	2.98	7.54	28-29	7	76152857| SJCHGC02284 protein [Schistosoma japonicum]
TC10838_1490	0.59	7.47	21-22	1	256082487| hypothetical protein [Schistosoma mansoni]
TC17766_639	2.15	7.45	21-22	1	>lcl|Smp_160830 ||29286.t000013, 29286.m000849|phospholipase d -related|Schistosoma mansoni|chr unknown01|||Auto
TC18163_712	1.39	7.4	19-20	1	>lcl|Smp_142970 ||29133.m000601, 29133.t000019|palmitoyl-protein thioesterase, putative|Schistosoma mansoni|chr unknown01|||Auto
TC13665_4850	1.18	7.35	19-20	1	>lcl|Smp_017730 ||29074.t000047|200-kDa GPI-anchored surface glycoprotein|Schistosoma mansoni|chr unknown01|||Auto
TC17127_1156	4.08	7.35	22-23	1	>lcl|Smp_162770 ||29300.m000763|expressed protein|Schistosoma mansoni|chr unknown01|||Auto
TC8040_524	1.35	7.3	19-20	2	>lcl|Smp_028870.3 ||29101.m000753, 29101.t000033|expressed protein|Schistosoma mansoni|chr unknown01|||Auto
TC7059_673	5.66	7.3	28-29	3	454258| unnamed protein product [Schistosoma mansoni]
TC13965_635	5.02	7.21	17-18	2	>lcl|Smp_127820 ||29058.t000056, 29058.m001789|expressed protein|Schistosoma mansoni|chr unknown01|||Auto
TC13086_571	2.64	7.05	23-24	2	76155694| SJCHGC03994 protein [Schistosoma japonicum]
TC9859_161	0.8	7.01	33-34	4	>lcl|Smp_129820 ||29065.m000944|multidrug resistance protein 1 (ATP-binding cassette C1), putative|Schistosoma mansoni|chr unknown01|||Auto
TC13086_620	2.78	6.97	23-24	2	76155694| SJCHGC03994 protein [Schistosoma japonicum]
TC16557_7238	0.44	6.61	25-26	2	161044| myosin heavy chain
TC16703_497	2.72	6.6	25-26	3	256048746| hypothetical protein [Schistosoma mansoni]
TC8413_427	0.78	6.56	21-22	1	>lcl|Smp_042400 ||29143.t000099, 29143.m001940|expressed protein|Schistosoma mansoni|chr unknown01|||Auto
TC11525_636	1.75	6.53	44-45	6	>lcl|Smp_077610 ||29307.t000016, 29307.m000879|expressed protein|Schistosoma mansoni|chr unknown01|||Auto
TC19501_247	1.35	6.53	18-19	2	56756088| SJCHGC08054 protein [Schistosoma japonicum]
TC11525_747	1.8	6.48	44-45	6	>lcl|Smp_077610 ||29307.t000016, 29307.m000879|expressed protein|Schistosoma mansoni|chr unknown01|||Auto
Contig7316_999	3.38	6.44	22-23	2	>lcl|11490_schisto-prots protein disulfide-isomerase [EC5.3.4.1], putative|Auto
TC14847_526	3.02	6.42	34-35	4	>lcl|Smp_044750 ||29152.t000020, 29152.m000348|marvel-containing potential lipid raft-associated protein, putative|Schistosoma mansoni|chr unknown01|||Auto
TC7466_1042	1.99	6.36	29-30	3	>lcl|Smp_055200 ||29188.m000658, 29188.t000025|dolichyl-diphosphooligosaccharide-proteinglycos yl transferase-related|Schistosoma mansoni|chr unknown01|||Auto
TC13965_728	4.43	6.33	17-18	2	>lcl|Smp_127820 ||29058.t000056, 29058.m001789|expressed protein|Schistosoma mansoni|chr unknown01|||Auto
Contig8732_1035	2.27	6.31	25-26	2	>lcl|12815_schisto-prots type B, 2;IPR008139,Saposin B;IPR011001,Saposin-like,domain-containing|Auto
TC14387_855	4	6.26	18-19	2	>lcl|Smp_045360.4 ||29155.m000743, 29155.t000022|expressed protein|Schistosoma mansoni|chr unknown01|||Auto
TC7598_1198	3.75	6.22	18-19	2	>lcl|Smp_045360.4 ||29155.m000743, 29155.t000022|expressed protein|Schistosoma mansoni|chr unknown01|||Auto
TC7364_1385	1.85	6.19	16-17	1	>lcl|Smp_079770.1 ||29337.t000010, 29337.m000263|protein disulfide-isomerase er-60 precursor (erp60)|Schistosoma mansoni|chr unknown01|||Auto
TC16938_967	2.9	6.19	19-20	3	256070935| hypothetical protein [Schistosoma mansoni]
TC19501_207	1.31	6.12	18-19	2	56756088| SJCHGC08054 protein [Schistosoma japonicum]
TC7710_1365	1.71	6.07	42-43	1	>lcl|Smp_089240 ||29459.m000457, 29459.t000027|beta-1,2-n-acetylglucosaminyltransferase II, putative|Schistosoma mansoni|chr unknown01|||Auto
TC13129_448	2.23	5.96	17-18	2	256074534| hypothetical protein [Schistosoma mansoni]
TC15897_645	2.22	5.83	25-26	6	>lcl|Smp_134080 ||29083.t000051, 29083.m000965|inositol transporter|Schistosoma mansoni|chr unknown01|||Auto
TC16568_847	1.29	5.78	17-18	2	>lcl|Smp_110400.1 ||36102.t000001, 36102.m000009|expressed protein|Schistosoma mansoni|chr unknown04|||Auto
TC10304_561	0.53	5.77	35-36	7	>lcl|Smp_171120 ||29463.m000636, 29463.t000005|UDP-galactose transporter, putative|Schistosoma mansoni|chr unknown01|||Auto
TC9324_751	1.06	5.77	20-21	1	>lcl|Smp_060570 ||29218.t000015, 29218.m000448|SARG904 , putative|Schistosoma mansoni|chr unknown01|||Auto
TC11824_605	1.46	5.76	24-25	NIL	>lcl|Smp_001180 ||29042.t000188|hypothetical conserved protein|Schistosoma mansoni|chr unknown01|||Auto
TC7872_1247	1.54	5.74	24-25	2	256074805| rna 3 terminal phosphate cyclase [Schistosoma mansoni]
TC17221_451	1.27	5.71	22-23	1	>lcl|Smp_143980 ||29139.m000936, 29139.t000022|expressed protein|Schistosoma mansoni|chr unknown01|||Auto
TC10875_625	1.02	5.7	23-24	1	>lcl|Smp_063330 ||29234.t000016, 29234.m000730|hypothetical protein|Schistosoma mansoni|chr unknown01|||Auto
TC13993_270	2.33	5.66	40-41	6	>lcl|Smp_095010 ||29616.m000302, 29616.t000010|phosphate transporter, putative|Schistosoma mansoni|chr unknown01|||Auto
TC11486_1028	2.07	5.64	23-24	1	>lcl|Smp_020210 ||29079.t000065, 29079.m002239|expressed protein|Schistosoma mansoni|chr unknown01|||Auto
TC14436_204	2.39	5.62	21-22	2	>lcl|Smp_152020 ||29192.t000007, 29192.m000564|expressed protein|Schistosoma mansoni|chr unknown01|||Auto
TC9186_473	4.24	5.59	28-29	2	56753375| SJCHGC09422 protein [Schistosoma japonicum]
TC14354_892	0.79	5.56	19-20	1	>lcl|Smp_068250 ||29264.m000334, 29264.t000011|Protoporphyrinogen oxidase, chloroplast/mitochondrial precursor, putative|Schistosoma mansoni|chr unknown01|||Auto
TC9525_321	3.87	5.54	29-30	2	>lcl|Smp_006300 ||29050.t000054, 29050.m00975|hypothetical protein|Schistosoma mansoni|chr unknown01|||Auto
TC14709_339	0.4	5.48	32-33	2	>lcl|Smp_089290 ||29460.m000350, 29460.t000005|alpha-galactosidase/alpha-n-acetylgalactosamini da se,putative|Schistosoma mansoni|chr unknown01|||Auto
TC11644_543	3.65	5.47	22-23	6	256090178| N-methyl-D-aspartate receptor-associated protein [Schistosoma mansoni]
TC18820_466	0.61	5.45	18-19	1	>lcl|Smp_026930 ||29096.t000024, 29096.m000780|alpha-1,3-mannosyl-glycoprotein beta-1, 2-n-acetylglucosaminyltransferase, putative|Schistosoma mansoni|chr unknown01|||Auto
TC19612_281	3.37	5.43	23-24	1	>lcl|Smp_172040 ||29472.m000467|unc-13 (munc13), putative|Schistosoma mansoni|chr unknown01||Partial|Auto
TC14387_815	3.37	5.42	18-19	2	>lcl|Smp_045360.4 ||29155.m000743, 29155.t000022|expressed protein|Schistosoma mansoni|chr unknown01|||Auto
TC7388_1709	1.63	5.37	13-14	1	>lcl|Smp_013040.1 ||29062.t000097, 29062.m001789|cathepsin D (A01 family)|Schistosoma mansoni|chr unknown01|||Auto
TC10875_565	1	5.29	23-24	1	>lcl|Smp_063330 ||29234.t000016, 29234.m000730|hypothetical protein|Schistosoma mansoni|chr unknown01|||Auto
TC13665_4930	1.13	5.28	19-20	1	>lcl|Smp_017730 ||29074.t000047|200-kDa GPI-anchored surface glycoprotein|Schistosoma mansoni|chr unknown01|||Auto
TC12968_321	0.29	5.27	32-33	2	>lcl|Smp_089290 ||29460.m000350, 29460.t000005|alpha-galactosidase/alpha-n-acetylgalactosamini da se,putative|Schistosoma mansoni|chr unknown01|||Auto
TC18163_672	0.98	5.19	19-20	1	>lcl|Smp_142970 ||29133.m000601, 29133.t000019|palmitoyl-protein thioesterase, putative|Schistosoma mansoni|chr unknown01|||Auto
TC8413_494	0.75	5.18	21-22	1	>lcl|Smp_042400 ||29143.t000099, 29143.m001940|expressed protein|Schistosoma mansoni|chr unknown01|||Auto
TC16810_1653	2.61	5.18	14-15	1	>lcl|Smp_105680.1 ||31048.t000008, 31048.m000221|expressed protein|Schistosoma mansoni|chr unknown02|||Auto
TC16677_655	0.7	5.16	25-26	1	>lcl|Smp_136220 ||29092.m00611|hypothetical protein|Schistosoma mansoni|chr unknown01|||Auto
TC16808_244	2.97	5.14	25-26	NIL	>lcl|Smp_179180 ||30923.m000023, 30923.t000002|ribosomal protein S2, eukaryotic and archaeal form, putative|Schistosoma mansoni|chr unknown01|||Auto
TC16290_208	1.27	5.13	33-34	1	>lcl|Smp_127810 ||29058.m001783|expressed protein|Schistosoma mansoni|chr unknown01|||Auto
TC14709_379	0.41	5.12	32-33	2	>lcl|Smp_089290 ||29460.m000350, 29460.t000005|alpha-galactosidase/alpha-n-acetylgalactosamini da se,putative|Schistosoma mansoni|chr unknown01|||Auto
TC17159_1035	6.36	5.08	32-33	1	>lcl|Smp_158900 ||29261.t000017, 29261.m000429|hypothetical protein|Schistosoma mansoni|chr unknown01|||Auto
TC10750_1810	2.51	5.08	17-18	1	256090238| arf gtpase-activating protein [Schistosoma mansoni]
TC16839_576	2.02	5.07	23-24	1	>lcl|Smp_116650 ||43729.m000007, 43729.t000001|expressed protein|Schistosoma mansoni|chr unknown08|||Auto
TC8002_424	1.57	5.07	20-21	1	256083856| hypothetical protein [Schistosoma mansoni]
TC7598_1374	2.75	5.05	18-19	2	>lcl|Smp_045360.4 ||29155.m000743, 29155.t000022|expressed protein|Schistosoma mansoni|chr unknown01|||Auto
TC18820_526	0.76	5.04	18-19	1	>lcl|Smp_026930 ||29096.t000024, 29096.m000780|alpha-1,3-mannosyl-glycoprotein beta-1, 2-n-acetylglucosaminyltransferase, putative|Schistosoma mansoni|chr unknown01|||Auto
TC19210_138	0.13	5.03	22-23	1	>lcl|Smp_098020 ||29654.t000018, 29654.m000275|expressed protein|Schistosoma mansoni|chr unknown01|||Auto
TC11520_633	1.65	5.03	21-22	2	>lcl|Smp_152020 ||29192.t000007, 29192.m000564|expressed protein|Schistosoma mansoni|chr unknown01|||Auto
TC9186_588	4.41	5.03	28-29	2	56753375| SJCHGC09422 protein [Schistosoma japonicum]
TC16290_268	1.18	5.02	33-34	1	>lcl|Smp_127810 ||29058.m001783|expressed protein|Schistosoma mansoni|chr unknown01|||Auto
TC15221_922	2.92	4.99	29-30	3	256078024| hypothetical protein [Schistosoma mansoni]
TC7075_1600	1.55	4.98	34-35	2	256082597| hypothetical protein [Schistosoma mansoni]
TC11930_541	3.36	4.97	26-27	1	256084719| alpha adaptin carboxyl-terminal domain [Schistosoma mansoni]
TC12255_714	3.19	4.95	28-29	1	67625698| TPA: hypothetical protein [Schistosoma mansoni]
TC14699_565	2.99	4.94	23-24	1	>lcl|Smp_042910 ||29144.m002285, 29144.t000080|expressed protein|Schistosoma mansoni|chr unknown01|||Auto
TC19656_381	1.32	4.91	21-22	4	>lcl|Smp_169870 ||29445.m000169, 29445.t000001|cystinosin, putative|Schistosoma mansoni|chr unknown01|||Auto
Contig3712_681	1.21	4.88	20-21	2	>lcl|4509_schisto-prots protein 68, putative|Auto
TC10841_829	2.11	4.87	33-34	7	>lcl|Smp_158600 ||29259.m000467, 29259.t000001|oligosaccharyl transferase, putative|Schistosoma mansoni|chr unknown01|||Auto
TC11486_967	1.93	4.85	23-24	1	>lcl|Smp_020210 ||29079.t000065, 29079.m002239|expressed protein|Schistosoma mansoni|chr unknown01|||Auto
TC17514_883	2.27	4.82	16-17	1	>lcl|Smp_041370 ||29142.t000035, 29142.m001439|expressed protein|Schistosoma mansoni|chr unknown01|||Auto
TC18500_21	3.26	4.8	15-16	3	>lcl|Smp_027040 ||29096.t000039, 29096.m000795|expressed protein|Schistosoma mansoni|chr unknown01|||Auto
TC12968_401	0.29	4.79	32-33	2	>lcl|Smp_089290 ||29460.m000350, 29460.t000005|alpha-galactosidase/alpha-n-acetylgalactosamini da se,putative|Schistosoma mansoni|chr unknown01|||Auto
TC12439_374	1.22	4.78	20-21	2	>lcl|Smp_162210 ||29297.t000013, 29297.m000654|expressed protein|Schistosoma mansoni|chr unknown01|||Auto
TC16719_2716	1.29	4.78	18-19	3	256048746| hypothetical protein [Schistosoma mansoni]
TC17238_1051	3.4	4.76	32-33	2	>lcl|Smp_167170.1 ||29369.t000006, 29369.m000699|ancient ubiquitous protein, putative|Schistosoma mansoni|chr unknown01|||Auto
TC11399_520	0.61	4.76	21-22	1	>lcl|Smp_147680 ||29162.m001018|reticulocalbin, putative|Schistosoma mansoni|chr unknown01|||Auto
TC12439_415	1.15	4.75	20-21	2	>lcl|Smp_162210 ||29297.t000013, 29297.m000654|expressed protein|Schistosoma mansoni|chr unknown01|||Auto
TC10750_1666	2.46	4.75	17-18	1	256090238| arf gtpase-activating protein [Schistosoma mansoni]
TC8011_926	3.79	4.73	28-29	1	256087674| integrin beta subunit [Schistosoma mansoni]
TC10304_611	0.53	4.68	35-36	7	>lcl|Smp_171120 ||29463.m000636, 29463.t000005|UDP-galactose transporter, putative|Schistosoma mansoni|chr unknown01|||Auto
TC18934_1	0.92	4.64	44-45	6	56753856| SJCHGC03676 protein [Schistosoma japonicum]
TC11930_470	2.94	4.64	26-27	1	256084719| alpha adaptin carboxyl-terminal domain [Schistosoma mansoni]
TC15390_723	3.71	4.62	17-18	1	>lcl|Smp_077880.2 ||29307.m000915, 29307.t000052|annexin, putative|Schistosoma mansoni|chr unknown01|||Auto
TC13993_310	2.19	4.62	40-41	6	>lcl|Smp_095010 ||29616.m000302, 29616.t000010|phosphate transporter, putative|Schistosoma mansoni|chr unknown01|||Auto
TC17389_1229	1.38	4.62	33-34	7	>lcl|Smp_158600 ||29259.m000467, 29259.t000001|oligosaccharyl transferase, putative|Schistosoma mansoni|chr unknown01|||Auto
TC10647_639	0.93	4.58	19-20	1	>lcl|Smp_000260 ||29042.t000054, 29042.m003491|saposin containing protein|Schistosoma mansoni|chr unknown01|||Auto
TC8718_1058	1.08	4.55	18-19	1	>lcl|Smp_066290 ||29248.t000001, 29248.m000115|expressed protein|Schistosoma mansoni|chr unknown01|||Auto
TC18771_675	2.17	4.54	18-19	2	>lcl|Smp_073280 ||29293.m000875, 29293.t000055|expressed protein|Schistosoma mansoni|chr unknown01|||Auto
TC14699_605	2.72	4.52	23-24	1	>lcl|Smp_042910 ||29144.m002285, 29144.t000080|expressed protein|Schistosoma mansoni|chr unknown01|||Auto
TC7599_2785	2.35	4.51	24-25	6	>lcl|Smp_012440 ||29061.t000083, 29061.m001309|glucose transport protein, putative|Schistosoma mansoni|chr unknown01|||Auto
TC12440_280	1.19	4.5	19-20	1	>lcl|Smp_162520 ||29299.m001038, 29299.t000008|cadherin-related|Schistosoma mansoni|chr unknown01|||Auto
TC16557_7135	0.31	4.5	25-26	2	161044| myosin heavy chain
Contig8512_785	1.27	4.46	31-32	1	76154365| SJCHGC06264 protein [Schistosoma japonicum]
TC14448_712	1.4	4.43	25-26	1	256088030| shc transforming protein [Schistosoma mansoni]
TC17472_759	2.45	4.42	28-29	2	256073461| hypothetical protein [Schistosoma mansoni]
TC7364_1480	1.74	4.4	16-17	1	>lcl|Smp_079770.1 ||29337.t000010, 29337.m000263|protein disulfide-isomerase er-60 precursor (erp60)|Schistosoma mansoni|chr unknown01|||Auto
TC7801_1401	1.14	4.35	20-21	1	>lcl|Smp_019030 ||29077.m002123, 29077.t000039|dipeptidyl-peptidase I (C01 family)|Schistosoma mansoni|chr unknown01|||Auto
TC13934_1100	1.33	4.35	25-26	1	>lcl|Smp_158320.2 ||29254.m000231|glypican, putative|Schistosoma mansoni|chr unknown01|||Auto
TC17362_688	2.32	4.34	26-27	1	>lcl|Smp_018760 ||29076.t000088, 29076.m001483|neutral alpha-glucosidase ab precursor (glucosidase II alpha subunit) (alpha glucosidase 2), putative|Schistosoma mansoni|chr unknown01|||Auto
TC15440_538	3.13	4.32	28-29	3	76154445| SJCHGC03394 protein [Schistosoma japonicum]
TC19656_421	1.14	4.29	21-22	4	>lcl|Smp_169870 ||29445.m000169, 29445.t000001|cystinosin, putative|Schistosoma mansoni|chr unknown01|||Auto
TC7909_661	1.9	4.29	27-28	5	>lcl|Smp_082620 ||29367.t000004, 29367.m000611|farnesylated-protein converting enzyme 1 (M48 family)|Schistosoma mansoni|chr unknown01|||Auto
TC11406_1548	2.26	4.29	29-30	4	76154134| SJCHGC06228 protein [Schistosoma japonicum]
TC11732_592	0.89	4.28	21-22	1	>lcl|Smp_160830 ||29286.t000013, 29286.m000849|phospholipase d -related|Schistosoma mansoni|chr unknown01|||Auto
TC17159_1075	6.42	4.27	32-33	1	>lcl|Smp_158900 ||29261.t000017, 29261.m000429|hypothetical protein|Schistosoma mansoni|chr unknown01|||Auto
Contig6191_621	1.3	4.27	18-19	2	56757005| SJCHGC06342 protein [Schistosoma japonicum]
TC14354_816	1.26	4.25	19-20	1	>lcl|Smp_068250 ||29264.m000334, 29264.t000011|Protoporphyrinogen oxidase, chloroplast/mitochondrial precursor, putative|Schistosoma mansoni|chr unknown01|||Auto
Contig7508_1314	1.31	4.25	20-21	1	256075733| histone-lysine n-methyltransferase suv9 [Schistosoma mansoni]
TC11106_729	0.67	4.22	28-29	4	>lcl|Smp_011560 ||29060.t000016, 29060.m001187|tetraspanin, putative|Schistosoma mansoni|chr unknown01|||Auto
TC13758_543	0.6	4.2	33-34	1	>lcl|Smp_194910 ||29070.m000863|expressed protein|Schistosoma mansoni|chr unknown01|||Auto
TC17472_589	2.53	4.2	28-29	2	256073461| hypothetical protein [Schistosoma mansoni]
TC7968_1658	2.41	4.18	32-33	NIL	>lcl|Smp_126600 ||29054.t000023, 29054.m001482|expressed protein|Schistosoma mansoni|chr unknown01|||Auto
TC18771_817	2.21	4.17	18-19	2	>lcl|Smp_073280 ||29293.m000875, 29293.t000055|expressed protein|Schistosoma mansoni|chr unknown01|||Auto
TC16075_312	0.97	4.17	22-23	2	256086760| solute carrier family 37 member 2 (glycerol-3-phosphate transporter [Schistosoma mansoni]
TC7599_2825	2.38	4.16	24-25	6	>lcl|Smp_012440 ||29061.t000083, 29061.m001309|glucose transport protein, putative|Schistosoma mansoni|chr unknown01|||Auto
TC7466_969	1.45	4.16	29-30	3	>lcl|Smp_055200 ||29188.m000658, 29188.t000025|dolichyl-diphosphooligosaccharide-proteinglycos yl transferase-related|Schistosoma mansoni|chr unknown01|||Auto
TC18130_532	2.22	4.15	14-15	5	256078800| oxalate:formate antiporter [Schistosoma mansoni]
TC16810_1768	2.1	4.14	14-15	1	>lcl|Smp_105680.1 ||31048.t000008, 31048.m000221|expressed protein|Schistosoma mansoni|chr unknown02|||Auto
TC7238_684	2.11	4.13	23-24	2	67625701| TPA: endonuclease-reverse transcriptase [Schistosoma mansoni]
TC11732_552	0.79	4.12	21-22	1	>lcl|Smp_160830 ||29286.t000013, 29286.m000849|phospholipase d -related|Schistosoma mansoni|chr unknown01|||Auto
TC7388_1669	1.42	4.12	13-14	1	>lcl|Smp_013040.1 ||29062.t000097, 29062.m001789|cathepsin D (A01 family)|Schistosoma mansoni|chr unknown01|||Auto
TC16890_927	2.45	4.12	29-30	2	29840932| SJCHGC01749 protein [Schistosoma japonicum]
TC7872_1088	1.17	4.12	24-25	2	256074805| rna 3 terminal phosphate cyclase [Schistosoma mansoni]
TC17766_541	1.45	4.11	21-22	1	>lcl|Smp_160830 ||29286.t000013, 29286.m000849|phospholipase d -related|Schistosoma mansoni|chr unknown01|||Auto
TC8350_881	0.68	4.11	33-34	1	256074906| hypothetical protein [Schistosoma mansoni]
TC8718_942	0.97	4.09	18-19	1	>lcl|Smp_066290 ||29248.t000001, 29248.m000115|expressed protein|Schistosoma mansoni|chr unknown01|||Auto
TC18130_572	2.54	4.07	14-15	5	256078800| oxalate:formate antiporter [Schistosoma mansoni]
TC16020_469	1.79	4.05	22-23	8	>lcl|Smp_066150 ||29245.t000003, 29245.m000042|solute carrier family 35 member C2, putative|Schistosoma mansoni|chr unknown01|||Auto
TC17362_728	2.57	4.03	26-27	1	>lcl|Smp_018760 ||29076.t000088, 29076.m001483|neutral alpha-glucosidase ab precursor (glucosidase II alpha subunit) (alpha glucosidase 2), putative|Schistosoma mansoni|chr unknown01|||Auto
TC19612_221	2.4	4.02	23-24	1	>lcl|Smp_172040 ||29472.m000467|unc-13 (munc13), putative|Schistosoma mansoni|chr unknown01||Partial|Auto
TC12194_434	1.53	4.01	33-34	1	>lcl|Smp_133270 ||29079.m002276, 29079.t000102|sel-1-like protein, sel-1l|Schistosoma mansoni|chr unknown01|||Auto
TC9393_572	1.18	3.95	20-21	2	>lcl|Smp_133700 ||29081.t000064, 29081.m001363|udp-glucoseglycoprotein:glucosyltransferase,putative|Schistosoma mansoni|chr unknown01|||Auto
TC14904_612	3.66	3.95	22-23	1	>lcl|Smp_144920 ||29143.m001856, 29143.t000015|expressed protein|Schistosoma mansoni|chr unknown01|||Auto
TC7059_510	3.94	3.95	28-29	3	454258| unnamed protein product [Schistosoma mansoni]
TC14589_835	0.62	3.94	32-33	NIL	>lcl|Smp_126600 ||29054.t000023, 29054.m001482|expressed protein|Schistosoma mansoni|chr unknown01|||Auto
TC16938_1013	2.54	3.93	19-20	3	256070935| hypothetical protein [Schistosoma mansoni]
TC17238_1010	3.16	3.92	32-33	2	>lcl|Smp_167170.1 ||29369.t000006, 29369.m000699|ancient ubiquitous protein, putative|Schistosoma mansoni|chr unknown01|||Auto
Contig6191_561	1.2	3.9	18-19	2	56757005| SJCHGC06342 protein [Schistosoma japonicum]
TC16075_21	0.91	3.9	22-23	2	256086760| solute carrier family 37 member 2 (glycerol-3-phosphate transporter [Schistosoma mansoni]
TC8011_865	3.52	3.87	28-29	1	256087674| integrin beta subunit [Schistosoma mansoni]
TC16890_971	2.31	3.86	29-30	2	29840932| SJCHGC01749 protein [Schistosoma japonicum]
TC15390_609	3.09	3.85	17-18	1	>lcl|Smp_077880.2 ||29307.m000915, 29307.t000052|annexin, putative|Schistosoma mansoni|chr unknown01|||Auto
TC14607_746	2.45	3.83	15-16	5	>lcl|Smp_054310 ||29185.m000861, 29185.t000006|S2P peptidase (M50 family)|Schistosoma mansoni|chr unknown01|||Auto
TC18504_384	2.03	3.82	17-18	1	>lcl|Smp_003340 ||29046.m002672, 29046.t000058|expressed protein|Schistosoma mansoni|chr unknown01|||Auto
TC13934_987	1.08	3.8	25-26	1	>lcl|Smp_158320.2 ||29254.m000231|glypican, putative|Schistosoma mansoni|chr unknown01|||Auto
TC10841_741	1.85	3.78	33-34	7	>lcl|Smp_158600 ||29259.m000467, 29259.t000001|oligosaccharyl transferase, putative|Schistosoma mansoni|chr unknown01|||Auto
TC7940_649	0.28	3.75	19-20	1	>lcl|Smp_063530.2 ||29235.m000886, 29235.t000004|apoferritin-2|Schistosoma mansoni|chr unknown01|||Auto
TC13136_298	1.51	3.75	17-18	1	>lcl|Smp_003340 ||29046.m002672, 29046.t000058|expressed protein|Schistosoma mansoni|chr unknown01|||Auto
TC14834_1105	1.74	3.73	37-38	2	>lcl|Smp_143730 ||29138.t000003, 29138.m000769|carboxypeptidase regulatory region-containing, putative|Schistosoma mansoni|chr unknown01|||Auto
TC15265_406	0.96	3.73	29-30	1	67625701| TPA: endonuclease-reverse transcriptase [Schistosoma mansoni]
TC7488_1062	1.23	3.72	24-25	3	>lcl|Smp_073400 ||29294.t000020, 29294.m000450|lysosome-associated membrane glycoprotein, putative|Schistosoma mansoni|chr unknown01|||Auto
TC10417_604	1.29	3.72	25-26	6	256069823| Halobacterial transducer protein VI [Schistosoma mansoni]
TC11034_588	2.06	3.71	28-29	2	>lcl|Smp_006060 ||29049.t000072, 29049.m001658|hypothetical protein|Schistosoma mansoni|chr unknown01|||Auto
TC8885_634	1.34	3.69	16-17	2	>lcl|Smp_140180 ||29115.m001376, 29115.t000073|cop-coated vesicle membrane protein P24 (emp24/gp25l family), putative|Schistosoma mansoni|chr unknown01|||Auto
TC11583_716	1.26	3.67	23-24	1	>lcl|Smp_133710 ||29081.m001369, 29081.t000070|importin 7,, putative|Schistosoma mansoni|chr unknown01|||Auto
TC7639_548	1.63	3.66	30-31	4	>lcl|Smp_095630 ||29627.t000004, 29627.m000247|CD9-like protein Sm-TSP-1|Schistosoma mansoni|chr unknown01|||Auto
TC11520_673	1.46	3.65	21-22	2	>lcl|Smp_152020 ||29192.t000007, 29192.m000564|expressed protein|Schistosoma mansoni|chr unknown01|||Auto
TC13531_684	4.33	3.65	23-24	1	>lcl|Smp_056460.1 ||29195.t000006, 29195.m000586|expressed protein|Schistosoma mansoni|chr unknown01|||Auto
TC14607_786	2.48	3.65	15-16	5	>lcl|Smp_054310 ||29185.m000861, 29185.t000006|S2P peptidase (M50 family)|Schistosoma mansoni|chr unknown01|||Auto
TC7639_694	1.42	3.63	30-31	4	>lcl|Smp_095630 ||29627.t000004, 29627.m000247|CD9-like protein Sm-TSP-1|Schistosoma mansoni|chr unknown01|||Auto
TC16992_1500	1.25	3.62	17-18	1	>lcl|Smp_031880 ||29111.m000946, 29111.t000042|basigin related|Schistosoma mansoni|chr unknown01|||Auto
TC11859_456	0.94	3.62	32-33	1	>lcl|Smp_159050 ||29263.m000464|plexin, putative|Schistosoma mansoni|chr unknown01|||Auto
TC11034_548	1.94	3.59	28-29	2	>lcl|Smp_006060 ||29049.t000072, 29049.m001658|hypothetical protein|Schistosoma mansoni|chr unknown01|||Auto
TC14834_1065	1.67	3.58	37-38	2	>lcl|Smp_143730 ||29138.t000003, 29138.m000769|carboxypeptidase regulatory region-containing, putative|Schistosoma mansoni|chr unknown01|||Auto
TC7801_1280	0.95	3.57	20-21	1	>lcl|Smp_019030 ||29077.m002123, 29077.t000039|dipeptidyl-peptidase I (C01 family)|Schistosoma mansoni|chr unknown01|||Auto
TC16965_2481	1.64	3.56	26-27	1	>lcl|Smp_018760 ||29076.t000088, 29076.m001483|neutral alpha-glucosidase ab precursor (glucosidase II alpha subunit) (alpha glucosidase 2), putative|Schistosoma mansoni|chr unknown01|||Auto
Contig3134_776	0.71	3.56	23-24	2	56758748| SJCHGC06117 protein [Schistosoma japonicum]
TC14706_395	1.33	3.55	17-18	3	215261803| Evi/Wls [Schmidtea mediterranea]
TC11824_646	1.67	3.54	24-25	NIL	>lcl|Smp_001180 ||29042.t000188|hypothetical conserved protein|Schistosoma mansoni|chr unknown01|||Auto
TC7691_1314	1.25	3.52	21-22	2	>lcl|Smp_030320 ||29104.t000115|F-box protein FBW7 (fragment), putative|Schistosoma mansoni|chr unknown01|||Auto
TC14360_103	1.83	3.52	23-24	1	256053066| strawberry notch-related [Schistosoma mansoni]
TC18504_344	1.86	3.51	17-18	1	>lcl|Smp_003340 ||29046.m002672, 29046.t000058|expressed protein|Schistosoma mansoni|chr unknown01|||Auto
TC10647_599	0.73	3.5	19-20	1	>lcl|Smp_000260 ||29042.t000054, 29042.m003491|saposin containing protein|Schistosoma mansoni|chr unknown01|||Auto
TC16965_2555	1.69	3.5	26-27	1	>lcl|Smp_018760 ||29076.t000088, 29076.m001483|neutral alpha-glucosidase ab precursor (glucosidase II alpha subunit) (alpha glucosidase 2), putative|Schistosoma mansoni|chr unknown01|||Auto
TC10924_668	1.57	3.5	23-24	2	44829167| TPA_exp: pol polyprotein [Schistosoma mansoni]
TC11859_524	0.78	3.48	32-33	1	>lcl|Smp_159050 ||29263.m000464|plexin, putative|Schistosoma mansoni|chr unknown01|||Auto
TC11009_277	0.75	3.48	20-21	1	>lcl|Smp_016490.2 ||29070.m000883, 29070.t000036|expressed protein|Schistosoma mansoni|chr unknown01|||Auto
TC7482_2072	1.7	3.47	20-21	1	>lcl|Smp_043150 ||29144.m002328, 29144.t000123|SmIrV1 protein, putative|Schistosoma mansoni|chr unknown01|||Auto
TC14706_293	1.39	3.47	17-18	3	215261803| Evi/Wls [Schmidtea mediterranea]
TC12144_31	2.22	3.47	24-25	3	256085379| hypothetical protein [Schistosoma mansoni]
TC11216_1024	1.61	3.46	31-32	6	>lcl|Smp_008580 ||29054.m001545, 29054.t000086|sugar transporter, putative|Schistosoma mansoni|chr unknown01|||Auto
TC13918_535	1.34	3.46	18-19	2	>lcl|Smp_089000.3 ||29458.t000006, 29458.m000420|translocon-associated protein, delta subunit, putative|Schistosoma mansoni|chr unknown01|||Auto
Contig3431_223	3.74	3.46	26-27	1	>lcl|12250_schisto-prots strictosidine synthase [EC4.3.3.2], putative|Auto
TC18435_470	1.14	3.44	19-20	1	>lcl|Smp_124920 ||29048.m001454, 29048.t000040|ero1-related|Schistosoma mansoni|chr unknown01|||Auto
TC10437_1606	1.14	3.43	17-18	1	>lcl|Smp_056760 ||29196.t000015, 29196.m000637|protein disulfide-isomerase, putative|Schistosoma mansoni|chr unknown01|||Auto
TC18435_428	1.18	3.43	19-20	1	>lcl|Smp_124920 ||29048.m001454, 29048.t000040|ero1-related|Schistosoma mansoni|chr unknown01|||Auto
TC13830_301	1.38	3.43	30-31	4	56752713| SJCHGC00284 protein [Schistosoma japonicum]
TC10437_1508	1.12	3.41	17-18	1	>lcl|Smp_056760 ||29196.t000015, 29196.m000637|protein disulfide-isomerase, putative|Schistosoma mansoni|chr unknown01|||Auto
TC11216_1066	1.67	3.41	31-32	6	>lcl|Smp_008580 ||29054.m001545, 29054.t000086|sugar transporter, putative|Schistosoma mansoni|chr unknown01|||Auto
TC13347_344	0.99	3.39	33-34	1	>lcl|Smp_133270 ||29079.m002276, 29079.t000102|sel-1-like protein, sel-1l|Schistosoma mansoni|chr unknown01|||Auto
TC13918_442	1.31	3.39	18-19	2	>lcl|Smp_089000.3 ||29458.t000006, 29458.m000420|translocon-associated protein, delta subunit, putative|Schistosoma mansoni|chr unknown01|||Auto
TC17750_1115	1.04	3.39	20-21	3	>lcl|Smp_194760 ||48072.m000329, 48072.t000010|hypothetical protein|Schistosoma mansoni|chr unknown10|||Auto
TC14368_704	3.36	3.36	16-17	2	>lcl|Smp_089670 ||29462.m000358, 29462.t000014|macroglobulin/complement,putative|Schistosoma mansoni|chr unknown01|||Auto
TC14429_1043	3.2	3.35	16-17	2	>lcl|Smp_089670 ||29462.m000358, 29462.t000014|macroglobulin/complement,putative|Schistosoma mansoni|chr unknown01|||Auto
TC13711_932	2.28	3.35	23-24	3	56754527| SJCHGC05480 protein [Schistosoma japonicum]
TC15488_603	1.56	3.34	21-22	1	>lcl|Smp_152840 ||29197.m000914|ATP-dependent RNA Helicase, putative|Schistosoma mansoni|chr unknown01|||Auto
TC11399_480	0.48	3.34	21-22	1	>lcl|Smp_147680 ||29162.m001018|reticulocalbin, putative|Schistosoma mansoni|chr unknown01|||Auto
Contig4046_817	0.8	3.34	18-19	4	56756338| SJCHGC03083 protein [Schistosoma japonicum]
TC14448_480	1.1	3.34	25-26	1	256088030| shc transforming protein [Schistosoma mansoni]
TC11301_772	1.75	3.32	27-28	1	256071953| hypothetical protein [Schistosoma mansoni]
TC8002_532	1.41	3.31	20-21	1	256083856| hypothetical protein [Schistosoma mansoni]
TC7166_81	0.94	3.29	24-25	NIL	256084008| hypothetical protein [Schistosoma mansoni]
TC17739_685	1.95	3.28	21-22	1	>lcl|Smp_027870 ||29099.t000003, 29099.m000889|hypothetical protein|Schistosoma mansoni|chr unknown01|||Auto
TC13711_824	2.95	3.27	23-24	3	56754527| SJCHGC05480 protein [Schistosoma japonicum]
TC19684_267	1.01	3.25	26-27	2	256052541| hypothetical protein [Schistosoma mansoni]
TC11009_627	0.83	3.24	20-21	1	>lcl|Smp_016490.2 ||29070.m000883, 29070.t000036|expressed protein|Schistosoma mansoni|chr unknown01|||Auto
Contig4178_322	1.4	3.24	24-25	3	256053081| zinc finger protein [Schistosoma mansoni]
TC10353_1861	0.78	3.23	18-19	NIL	160925| A.1.12/9 antigen
TC7940_588	0.28	3.22	19-20	1	>lcl|Smp_063530.2 ||29235.m000886, 29235.t000004|apoferritin-2|Schistosoma mansoni|chr unknown01|||Auto
TC14342_485	2.85	3.22	16-17	2	>lcl|Smp_089670 ||29462.m000358, 29462.t000014|macroglobulin/complement,putative|Schistosoma mansoni|chr unknown01|||Auto
TC6922_925	2.1	3.22	15-16	4	256092282| hypothetical protein [Schistosoma mansoni]
TC19257_325	1.38	3.22	26-27	1	256080397| hypothetical protein [Schistosoma mansoni]
TC13830_321	1.35	3.21	30-31	4	56752713| SJCHGC00284 protein [Schistosoma japonicum]
Contig5125_1049	1.18	3.2	37-38	3	76162536| SJCHGC03653 protein [Schistosoma japonicum]
TC6922_774	1.98	3.2	15-16	4	256092282| hypothetical protein [Schistosoma mansoni]
TC12198_564	0.28	3.18	18-19	1	>lcl|Smp_161220 ||29288.m000746, 29288.t000017|strictosidinesynthase-related|Schistosoma mansoni|chr unknown01|||Auto
Contig3909_514	1.46	3.18	48-49	1	>lcl|9867_schisto-prots protein|Auto
TC16925_2124	2.12	3.18	51-52	7	>lcl|Smp_164160 ||29307.t000045, 29307.m000908|tumor differentially expressed protein, putative|Schistosoma mansoni|chr unknown01|||Auto
TC18702_709	0.76	3.17	25-26	1	>lcl|Smp_004710 ||29047.m002306, 29047.t000095|hypothetical protein|Schistosoma mansoni|chr unknown01|||Auto
TC18702_749	0.75	3.17	25-26	1	>lcl|Smp_004710 ||29047.m002306, 29047.t000095|hypothetical protein|Schistosoma mansoni|chr unknown01|||Auto
TC14429_1001	2.85	3.17	16-17	2	>lcl|Smp_089670 ||29462.m000358, 29462.t000014|macroglobulin/complement,putative|Schistosoma mansoni|chr unknown01|||Auto
TC19486_361	1.74	3.15	24-25	NIL	>lcl|Smp_001180 ||29042.t000188|hypothetical conserved protein|Schistosoma mansoni|chr unknown01|||Auto
TC11016_1027	0.98	3.14	36-37	2	171473982| SJCHGC02237 protein [Schistosoma japonicum]
TC16990_307	1.5	3.08	22-23	1	>lcl|Smp_177910 ||30220.m000010, 30220.t000001|40S ribosomal protein S10, putative|Schistosoma mansoni|chr unknown01||Partial|Auto
TC16808_852	2.19	3.07	25-26	NIL	>lcl|Smp_179180 ||30923.m000023, 30923.t000002|ribosomal protein S2, eukaryotic and archaeal form, putative|Schistosoma mansoni|chr unknown01|||Auto
TC17081_673	1.5	3.04	17-18	2	>lcl|Smp_046250 ||29158.m000271, 29158.t000010|copii-coated vesicle membrane protein P24, putative|Schistosoma mansoni|chr unknown01|||Auto
TC15221_768	1.99	3.04	29-30	3	256078024| hypothetical protein [Schistosoma mansoni]
TC12751_437	1.42	3.02	34-35	2	>lcl|Smp_196010 ||29100.t000040, 29100.m001318|stomatin-related|Schistosoma mansoni|chr unknown01||Partial|Auto
TC17212_1033	1.22	3	34-35	2	>lcl|Smp_000190 ||29042.m003479, 29042.t000042|oxidoreductase, short chain dehydrogenase/reductase family, putative|Schistosoma mansoni|chr unknown01|||Auto
TC10865_1608	0.96	2.99	16-17	3	>lcl|Smp_002600.2 ||29045.t000046, 29045.m02141|lysosomal Pro-Xaa carboxypeptidase (S28 family)|Schistosoma mansoni|chr unknown01|||Auto
Contig4543_615	1.28	2.98	23-24	1	256074661| U3 small nucleolar rna (U3 snorna) associated protein [Schistosoma mansoni]
TC18334_524	0.86	2.97	24-25	NIL	>lcl|Smp_007450.2 ||29052.t000073, 29052.m001485|expressed protein|Schistosoma mansoni|chr unknown01|||Auto
TC15913_465	2.23	2.97	25-26	4	>lcl|Smp_041460 ||29142.t000047, 29142.m001451|tetraspanin D76 , putative|Schistosoma mansoni|chr unknown01|||Auto
TC17081_576	1.47	2.96	17-18	2	>lcl|Smp_046250 ||29158.m000271, 29158.t000010|copii-coated vesicle membrane protein P24, putative|Schistosoma mansoni|chr unknown01|||Auto
TC10667_1319	1.21	2.95	16-17	2	>lcl|Smp_035470 ||29119.m002174, 29119.t000102|dolichyl-diphosphooligosaccharide-protein glycosyltransferase, putative|Schistosoma mansoni|chr unknown01|||Auto
TC17750_983	1.24	2.95	20-21	3	>lcl|Smp_194760 ||48072.m000329, 48072.t000010|hypothetical protein|Schistosoma mansoni|chr unknown10|||Auto
TC19486_268	1.72	2.93	24-25	NIL	>lcl|Smp_001180 ||29042.t000188|hypothetical conserved protein|Schistosoma mansoni|chr unknown01|||Auto
TC10865_1568	0.94	2.93	16-17	3	>lcl|Smp_002600.2 ||29045.t000046, 29045.m02141|lysosomal Pro-Xaa carboxypeptidase (S28 family)|Schistosoma mansoni|chr unknown01|||Auto
Contig8572_1476	1.81	2.92	23-24	1	>lcl|6936_schisto-prots putative|Auto
TC12194_392	1.31	2.9	33-34	1	>lcl|Smp_133270 ||29079.m002276, 29079.t000102|sel-1-like protein, sel-1l|Schistosoma mansoni|chr unknown01|||Auto
TC10628_535	3.84	2.9	14-15	NIL	4877954| Rho GTPase [Schistosoma mansoni]
TC11167_1264	0.46	2.89	21-22	1	>lcl|Smp_141080 ||29119.t000020, 29119.m002092|DNAj (hsp40) homolog, subfamily B, member, putative|Schistosoma mansoni|chr unknown01|||Auto
TC17789_732	1.08	2.89	28-29	2	>lcl|Smp_023240 ||29086.m000871, 29086.t000035|gliacolin-related|Schistosoma mansoni|chr unknown01|||Auto
TC15771_369	1.62	2.88	19-20	2	>lcl|Smp_129390 ||29063.t000045, 29063.m001620|vacuolar protein sorting-associated protein (vps13b), putative|Schistosoma mansoni|chr unknown01|||Auto
TC10630_66	1.03	2.86	29-30	NIL	56753153| SJCHGC05978 protein [Schistosoma japonicum]
TC7166_165	1.13	2.86	24-25	NIL	256084008| hypothetical protein [Schistosoma mansoni]
TC18133_496	1.13	2.85	31-32	2	76154272| SJCHGC08989 protein [Schistosoma japonicum]
TC8455_766	3.03	2.84	25-26	4	>lcl|Smp_041460 ||29142.t000047, 29142.m001451|tetraspanin D76 , putative|Schistosoma mansoni|chr unknown01|||Auto
TC16999_1778	1.43	2.84	21-22	1	>lcl|Smp_137070.1 ||29098.m001235|expressed protein|Schistosoma mansoni|chr unknown01|||Auto
TC14342_465	2.49	2.84	16-17	2	>lcl|Smp_089670 ||29462.m000358, 29462.t000014|macroglobulin/complement,putative|Schistosoma mansoni|chr unknown01|||Auto
TC19257_378	1.26	2.82	26-27	1	256080397| hypothetical protein [Schistosoma mansoni]
TC8885_583	1.2	2.81	16-17	2	>lcl|Smp_140180 ||29115.m001376, 29115.t000073|cop-coated vesicle membrane protein P24 (emp24/gp25l family), putative|Schistosoma mansoni|chr unknown01|||Auto
TC17034_683	2.11	2.81	21-22	4	>lcl|Smp_000070 |slc1||1-acyl-sn-glycerol-3-phosphateo-acyltransferase|Schistosoma mansoni|chr unknown01|||Auto
TC10290_426	1.36	2.8	20-21	1	256079941| supervillin [Schistosoma mansoni]
Contig3928_733	1.25	2.78	35-36	5	>lcl|582_schisto-prots transporter, putative|Auto
TC10856_2176	1.4	2.78	17-18	1	76154276| SJCHGC04856 protein [Schistosoma japonicum]
TC15335_781	1.23	2.77	19-20	2	>lcl|Smp_012450 ||29062.t000001, 29062.m001679|Kae1 putative peptidase (M22 family)|Schistosoma mansoni|chr unknown01|||Auto
Contig4144_607	0.9	2.76	24-25	1	>lcl|2824_schisto-prots protein|Auto
TC14792_1209	2.16	2.76	25-26	5	>lcl|Smp_090870 ||29469.m000422, 29469.t000002|protein transport protein Sec13, putative|Schistosoma mansoni|chr unknown01|||Auto
TC12751_481	1.48	2.75	34-35	2	>lcl|Smp_196010 ||29100.t000040, 29100.m001318|stomatin-related|Schistosoma mansoni|chr unknown01||Partial|Auto
Contig4106_589	1.39	2.75	19-20	2	56759000| SJCHGC05632 protein [Schistosoma japonicum]
TC15601_73	1.52	2.74	18-19	1	>lcl|Smp_163130 ||29303.m000584|transmembrane 9 superfamily protein member, putative|Schistosoma mansoni|chr unknown01|||Auto
TC7802_983	1.8	2.74	26-27	6	>lcl|Smp_026910.1 ||29096.m000806, 29096.t000020|lipase maturation factor|Schistosoma mansoni|chr unknown01|||Auto
TC16677_81	1.6	2.74	25-26	1	>lcl|Smp_136220 ||29092.m00611|hypothetical protein|Schistosoma mansoni|chr unknown01|||Auto
TC10032_573	0.91	2.74	23-24	1	>lcl|Smp_179560 ||30974.t000002, 30974.m000085|multiple inositol polyphosphate phosphatase-related|Schistosoma mansoni|chr unknown01|||Auto
TC18037_387	7.17	2.73	37-38	1	>lcl|Smp_005500 ||29048.t000082, 29048.m001496|n-acetylgalactosaminyltransferase,putative|Schistosoma mansoni|chr unknown01|||Auto
TC16925_2079	2.04	2.73	51-52	7	>lcl|Smp_164160 ||29307.t000045, 29307.m000908|tumor differentially expressed protein, putative|Schistosoma mansoni|chr unknown01|||Auto
TC10667_1172	1.33	2.72	16-17	2	>lcl|Smp_035470 ||29119.m002174, 29119.t000102|dolichyl-diphosphooligosaccharide-protein glycosyltransferase, putative|Schistosoma mansoni|chr unknown01|||Auto
TC18200_602	1.01	2.72	29-30	2	>lcl|Smp_101330 ||30511.t000001, 30511.m000031|ribosomal pseudouridine synthase, putative|Schistosoma mansoni|chr unknown01|||Auto
TC14339_874	2.04	2.72	27-28	1	>lcl|Smp_153390.2 ||29200.m000689, 29200.t000032|ectonucleotidepyrophosphatase/phosphodiesterase,putative|Schistosoma mansoni|chr unknown01|||Auto
TC13994_1340	1.67	2.72	34-35	6	256088569| phosphate transporter [Schistosoma mansoni]
TC14196_624	1.24	2.71	22-23	2	>lcl|Smp_079310 ||29334.m000554, 29334.t000016|transmembrane protein tmp21-related|Schistosoma mansoni|chr unknown01|||Auto
TC16992_1679	1.23	2.71	17-18	1	>lcl|Smp_031880 ||29111.m000946, 29111.t000042|basigin related|Schistosoma mansoni|chr unknown01|||Auto
TC7910_755	1.15	2.71	27-28	5	>lcl|Smp_082620 ||29367.t000004, 29367.m000611|farnesylated-protein converting enzyme 1 (M48 family)|Schistosoma mansoni|chr unknown01|||Auto
TC14236_741	0.2	2.66	17-18	4	>lcl|Smp_089200 ||29459.t000019, 29459.m000449|multidrug resistance protein 1, 2, 3 (p glycoprotein 1, 2, 3), putative|Schistosoma mansoni|chr unknown01|||Auto
TC15488_643	1.3	2.66	21-22	1	>lcl|Smp_152840 ||29197.m000914|ATP-dependent RNA Helicase, putative|Schistosoma mansoni|chr unknown01|||Auto
TC8174_791	1.53	2.66	18-19	1	>lcl|Smp_168480 ||29414.m000208|apoptosis inhibitor, putative|Schistosoma mansoni|chr unknown01|||Auto
TC8174_751	1.33	2.66	18-19	1	>lcl|Smp_168480 ||29414.m000208|apoptosis inhibitor, putative|Schistosoma mansoni|chr unknown01|||Auto
TC7909_774	1.49	2.65	27-28	5	>lcl|Smp_082620 ||29367.t000004, 29367.m000611|farnesylated-protein converting enzyme 1 (M48 family)|Schistosoma mansoni|chr unknown01|||Auto
TC7691_1202	0.91	2.64	21-22	2	>lcl|Smp_030320 ||29104.t000115|F-box protein FBW7 (fragment), putative|Schistosoma mansoni|chr unknown01|||Auto
TC18899_388	1.9	2.63	25-26	3	>lcl|Smp_171300 ||29464.m000241|hypothetical protein|Schistosoma mansoni|chr unknown01|||Auto
TC7910_795	1.08	2.63	27-28	5	>lcl|Smp_082620 ||29367.t000004, 29367.m000611|farnesylated-protein converting enzyme 1 (M48 family)|Schistosoma mansoni|chr unknown01|||Auto
TC14408_938	1.71	2.63	18-19	5	>lcl|Smp_139720 ||29113.m000725, 29113.t000025|zinc transporter, putative|Schistosoma mansoni|chr unknown01|||Auto
TC14300_1281	1.26	2.63	25-26	1	>lcl|Smp_009990 ||29057.m001680, 29057.t000057|tyrosine kinase|Schistosoma mansoni|chr unknown01|||Auto
TC19666_609	0.66	2.63	15-16	1	256092362| hypothetical protein [Schistosoma mansoni]
TC11346_888	1.2	2.62	23-24	1	>lcl|Smp_167690 ||29373.m000596|ubiquitin-protein ligase, putative|Schistosoma mansoni|chr unknown01|||Auto
TC17789_691	0.97	2.61	28-29	2	>lcl|Smp_023240 ||29086.m000871, 29086.t000035|gliacolin-related|Schistosoma mansoni|chr unknown01|||Auto
TC17739_594	1.55	2.61	21-22	1	>lcl|Smp_027870 ||29099.t000003, 29099.m000889|hypothetical protein|Schistosoma mansoni|chr unknown01|||Auto
TC17221_386	1.03	2.61	22-23	1	>lcl|Smp_143980 ||29139.m000936, 29139.t000022|expressed protein|Schistosoma mansoni|chr unknown01|||Auto
TC15440_478	1.88	2.61	28-29	3	76154445| SJCHGC03394 protein [Schistosoma japonicum]
TC9143_472	1.11	2.6	23-24	1	29841190| SJCHGC02171 protein [Schistosoma japonicum]
TC12062_196	1.59	2.59	20-21	2	>lcl|Smp_024580.2 ||29090.t000017, 29090.m001590|mannosyl-oligosaccharide glucosidase, putative|Schistosoma mansoni|chr unknown01|||Auto
TC11167_1114	0.4	2.59	21-22	1	>lcl|Smp_141080 ||29119.t000020, 29119.m002092|DNAj (hsp40) homolog, subfamily B, member, putative|Schistosoma mansoni|chr unknown01|||Auto
TC16884_507	1.19	2.59	15-16	NIL	256081142| hypothetical protein [Schistosoma mansoni]
Contig2829_562	0.96	2.58	18-19	1	>lcl|10001_schisto-prots protein|Auto
TC13889_370	0.81	2.58	16-17	1	256079375| ATP synthase alpha subunit vacuolar [Schistosoma mansoni]
TC7802_923	1.74	2.57	26-27	6	>lcl|Smp_026910.1 ||29096.m000806, 29096.t000020|lipase maturation factor|Schistosoma mansoni|chr unknown01|||Auto
TC14589_875	1.2	2.55	32-33	NIL	>lcl|Smp_126600 ||29054.t000023, 29054.m001482|expressed protein|Schistosoma mansoni|chr unknown01|||Auto
TC14836_649	1.01	2.55	31-32	1	256074682| hypothetical protein [Schistosoma mansoni]
Contig8715_594	1.03	2.54	16-17	5	>lcl|11811_schisto-prots protein|Auto
TC11610_614	2.72	2.52	20-21	1	>lcl|Smp_068090 ||29263.m000458, 29263.t000017|zinc phosphodiesterase, putative|Schistosoma mansoni|chr unknown01|||Auto
TC14165_1409	1.5	2.52	16-17	NIL	>lcl|Smp_005060.2 ||29048.m001500, 29048.t000016|expressed protein|Schistosoma mansoni|chr unknown01|||Auto
TC14332_204	0.47	2.51	35-36	7	>lcl|Smp_140510 ||29116.m001865|transmembrane protein 56 , putative|Schistosoma mansoni|chr unknown01|||Auto
TC10032_785	1.03	2.5	23-24	1	>lcl|Smp_179560 ||30974.t000002, 30974.m000085|multiple inositol polyphosphate phosphatase-related|Schistosoma mansoni|chr unknown01|||Auto
TC13347_385	0.82	2.5	33-34	1	>lcl|Smp_133270 ||29079.m002276, 29079.t000102|sel-1-like protein, sel-1l|Schistosoma mansoni|chr unknown01|||Auto
TC18133_547	0.99	2.48	31-32	2	76154272| SJCHGC08989 protein [Schistosoma japonicum]
TC14196_805	1.12	2.47	22-23	2	>lcl|Smp_079310 ||29334.m000554, 29334.t000016|transmembrane protein tmp21-related|Schistosoma mansoni|chr unknown01|||Auto
Contig6935_583	0.94	2.46	32-33	2	>lcl|12340_schisto-prots putative enzyme (brainiac), putative|Auto
Contig5881_719	1.13	2.45	15-16	7	>lcl|3634_schisto-prots E3 ubiquitin-protein ligase synoviolin, putative|Auto
Contig501_594	1.49	2.45	27-28	1	>lcl|5980_schisto-prots acetylcholine receptor subunit alpha-7 precursor, putative|Auto
TC16990_520	1.55	2.44	22-23	1	>lcl|Smp_177910 ||30220.m000010, 30220.t000001|40S ribosomal protein S10, putative|Schistosoma mansoni|chr unknown01||Partial|Auto
TC14165_1461	1.53	2.44	16-17	NIL	>lcl|Smp_005060.2 ||29048.m001500, 29048.t000016|expressed protein|Schistosoma mansoni|chr unknown01|||Auto
TC18633_1253	1.19	2.44	19-20	3	>lcl|Smp_069240 ||29274.m000356, 29274.t000016|voltage-gated potassium channel, putative|Schistosoma mansoni|chr unknown01|||Auto
TC10729_558	2.57	2.43	30-31	6	>lcl|Smp_007730.2 ||29053.t000019, 29053.m001209|ER lumen protein retaining receptor, putative|Schistosoma mansoni|chr unknown01|||Auto
TC13808_490	1.05	2.42	20-21	NIL	>lcl|Smp_060190.2 ||29215.m000402, 29215.t000005|ctg4a-related|Schistosoma mansoni|chr unknown01|||Auto
TC7488_845	0.93	2.41	24-25	3	>lcl|Smp_073400 ||29294.t000020, 29294.m000450|lysosome-associated membrane glycoprotein, putative|Schistosoma mansoni|chr unknown01|||Auto
TC12600_541	1.85	2.4	20-21	1	>lcl|Smp_158140 ||29252.t000002, 29252.m000270|prokaryotic DNA topoisomerase, putative|Schistosoma mansoni|chr unknown01|||Auto
TC8548_806	1.41	2.39	26-27	2	>lcl|Smp_083020 ||29369.m000701, 29369.t000008|let1/narf-related|Schistosoma mansoni|chr unknown01|||Auto
TC18334_391	0.65	2.38	24-25	NIL	>lcl|Smp_007450.2 ||29052.t000073, 29052.m001485|expressed protein|Schistosoma mansoni|chr unknown01|||Auto
TC14412_1422	1.2	2.37	23-24	2	>lcl|Smp_169560 ||29440.m000208|subfamily M23B non-peptidase homologue (M23 family)|Schistosoma mansoni|chr unknown01|||Auto
TC14792_1161	2	2.37	25-26	5	>lcl|Smp_090870 ||29469.m000422, 29469.t000002|protein transport protein Sec13, putative|Schistosoma mansoni|chr unknown01|||Auto
TC7136_347	0.6	2.36	15-16	2	>lcl|Smp_150390.2 ||29176.t000013, 29176.m000496|expressed protein|Schistosoma mansoni|chr unknown01|||Auto
TC17212_973	1.13	2.35	34-35	2	>lcl|Smp_000190 ||29042.m003479, 29042.t000042|oxidoreductase, short chain dehydrogenase/reductase family, putative|Schistosoma mansoni|chr unknown01|||Auto
TC17434_276	1.33	2.35	24-25	1	>lcl|Smp_046630 ||29159.m000838, 29159.t000048|expressed protein|Schistosoma mansoni|chr unknown01|||Auto
TC12487_498	4.63	2.34	35-36	1	256084283| hypothetical protein [Schistosoma mansoni]
TC10799_1141	1.66	2.33	17-18	2	>lcl|Smp_008320 ||29054.m001502, 29054.t000043|pap-inositol-1,4-phosphatase,putative|Schistosoma mansoni|chr unknown01|||Auto
TC14332_249	0.47	2.33	35-36	7	>lcl|Smp_140510 ||29116.m001865|transmembrane protein 56 , putative|Schistosoma mansoni|chr unknown01|||Auto
TC8367_821	1.41	2.33	18-19	4	>lcl|Smp_009430 ||29056.m001238, 29056.t000031|steroid dehydrogenase, putative|Schistosoma mansoni|chr unknown01|||Auto
Contig5875_602	2.27	2.32	26-27	1	>lcl|11176_schisto-prots protein phosphatase [EC3.1.3.16], putative|Auto
TC12600_590	1.9	2.32	20-21	1	>lcl|Smp_158140 ||29252.t000002, 29252.m000270|prokaryotic DNA topoisomerase, putative|Schistosoma mansoni|chr unknown01|||Auto
TC7851_1507	0.74	2.3	16-17	2	>lcl|Smp_133200 ||29079.m002247|peptidase Clp (S14 family)|Schistosoma mansoni|chr unknown01|||Auto
TC14460_1342	1.23	2.3	28-29	1	>lcl|5090_schisto-prots putative|Auto
TC9884_380	1.92	2.3	24-25	NIL	>lcl|Smp_001180 ||29042.t000188|hypothetical conserved protein|Schistosoma mansoni|chr unknown01|||Auto
TC10602_1661	1.96	2.3	16-17	1	56756248| SJCHGC06229 protein [Schistosoma japonicum]
TC17217_1462	1.26	2.3	28-29	1	256088892| Fxna peptidase (M28 family) [Schistosoma mansoni]
TC18438_566	2.32	2.3	36-37	2	76156068| SJCHGC05680 protein [Schistosoma japonicum]
TC13485_924	1.2	2.29	37-38	2	>lcl|Smp_088240 ||29450.t000015, 29450.m000326|expressed protein|Schistosoma mansoni|chr unknown01|||Auto
TC16884_547	1.66	2.29	15-16	NIL	256081142| hypothetical protein [Schistosoma mansoni]
TC7889_1418	1.23	2.28	33-34	3	256084265| family S28 unassigned peptidase (S28 family) [Schistosoma mansoni]
TC12198_668	0.21	2.27	18-19	1	>lcl|Smp_161220 ||29288.m000746, 29288.t000017|strictosidinesynthase-related|Schistosoma mansoni|chr unknown01|||Auto
Contig8758_1537	2.82	2.27	18-19	NIL	>lcl|7438_schisto-prots resistance-associated overexpressed protein, putative|Auto
TC9353_661	1.25	2.26	23-24	1	>lcl|Smp_020000 ||29079.m02527, 29079.t00112|expressed protein|Schistosoma mansoni|chr unknown01|||Auto
TC14197_805	0.82	2.26	16-17	1	56754225| SJCHGC09529 protein [Schistosoma japonicum]
Contig3134_736	0.48	2.25	23-24	2	56758748| SJCHGC06117 protein [Schistosoma japonicum]
TC7391_1213	3.45	2.25	22-23	2	170581816| AMP-binding enzyme family protein [Brugia malayi]
TC12854_568	1.7	2.25	20-21	5	56756519| SJCHGC03997 protein [Schistosoma japonicum]
TC19410_421	2.4	2.24	23-24	NIL	256082013| hypothetical protein [Schistosoma mansoni]
Contig3105_557	1.49	2.24	25-26	5	56757545| SJCHGC05631 protein [Schistosoma japonicum]
TC11016_847	0.77	2.24	36-37	2	171473982| SJCHGC02237 protein [Schistosoma japonicum]
TC11346_965	1.85	2.23	23-24	1	>lcl|Smp_167690 ||29373.m000596|ubiquitin-protein ligase, putative|Schistosoma mansoni|chr unknown01|||Auto
TC8073_1096	1.06	2.23	25-26	1	>lcl|Smp_138960 ||29108.m000635|SPFH domain protein 1 precursor. , putative|Schistosoma mansoni|chr unknown01|||Auto
TC7889_1357	1.5	2.23	33-34	3	256084265| family S28 unassigned peptidase (S28 family) [Schistosoma mansoni]
TC15634_476	0.51	2.22	22-23	1	>lcl|Smp_153070 ||29198.m001083|hypothetical protein|Schistosoma mansoni|chr unknown01|||Auto
TC7721_1048	1.41	2.22	32-33	6	>lcl|Smp_075860.2 ||29302.m000609, 29302.t000018|60S ribosomal protein L35, putative|Schistosoma mansoni|chr unknown01|||Auto
TC10729_700	3.46	2.22	30-31	6	>lcl|Smp_007730.2 ||29053.t000019, 29053.m001209|ER lumen protein retaining receptor, putative|Schistosoma mansoni|chr unknown01|||Auto
TC7767_1157	2.11	2.22	37-38	3	256073366| prominin (prom) protein [Schistosoma mansoni]
TC17434_215	1.4	2.21	24-25	1	>lcl|Smp_046630 ||29159.m000838, 29159.t000048|expressed protein|Schistosoma mansoni|chr unknown01|||Auto
TC16233_349	4.06	2.2	17-18	3	>lcl|Smp_173390 ||29582.m000162|ribosomal protein L5, putative|Schistosoma mansoni|chr unknown01|||Auto
TC9143_352	0.92	2.2	23-24	1	29841190| SJCHGC02171 protein [Schistosoma japonicum]
TC8759_820	0.84	2.2	33-34	3	76156244| SJCHGC02918 protein [Schistosoma japonicum]
TC16282_547	0.47	2.19	15-16	1	>lcl|Smp_142190 ||29128.m000488|carboxypeptidase N (M14 family)|Schistosoma mansoni|chr unknown01|||Auto
TC16282_439	0.45	2.19	15-16	1	>lcl|Smp_142190 ||29128.m000488|carboxypeptidase N (M14 family)|Schistosoma mansoni|chr unknown01|||Auto
TC9353_742	1.51	2.18	23-24	1	>lcl|Smp_020000 ||29079.m02527, 29079.t00112|expressed protein|Schistosoma mansoni|chr unknown01|||Auto
TC12487_457	3.83	2.17	35-36	1	256084283| hypothetical protein [Schistosoma mansoni]
TC7851_1635	0.79	2.16	16-17	2	>lcl|Smp_133200 ||29079.m002247|peptidase Clp (S14 family)|Schistosoma mansoni|chr unknown01|||Auto
TC14412_1350	1.15	2.15	23-24	2	>lcl|Smp_169560 ||29440.m000208|subfamily M23B non-peptidase homologue (M23 family)|Schistosoma mansoni|chr unknown01|||Auto
TC18953_309	1.67	2.15	23-24	1	>lcl|Smp_133710 ||29081.m001369, 29081.t000070|importin 7,, putative|Schistosoma mansoni|chr unknown01|||Auto
TC14408_1044	1.31	2.14	18-19	5	>lcl|Smp_139720 ||29113.m000725, 29113.t000025|zinc transporter, putative|Schistosoma mansoni|chr unknown01|||Auto
Contig2993_758	1.12	2.14	19-20	2	>lcl|11697_schisto-prots protein disulfide-isomerase [EC5.3.4.1], putative|Auto
TC7721_1088	1.41	2.14	32-33	6	>lcl|Smp_075860.2 ||29302.m000609, 29302.t000018|60S ribosomal protein L35, putative|Schistosoma mansoni|chr unknown01|||Auto
TC13985_1468	1.04	2.14	16-17	1	>lcl|Smp_041370 ||29142.t000035, 29142.m001439|expressed protein|Schistosoma mansoni|chr unknown01|||Auto
TC7365_3104	1.94	2.14	27-28	NIL	256070361| hypothetical protein [Schistosoma mansoni]
TC10602_1620	1.79	2.14	16-17	1	56756248| SJCHGC06229 protein [Schistosoma japonicum]
TC8073_1056	1.04	2.13	25-26	1	>lcl|Smp_138960 ||29108.m000635|SPFH domain protein 1 precursor. , putative|Schistosoma mansoni|chr unknown01|||Auto
TC13278_458	1.05	2.11	37-38	4	256076550| bestrophin-related [Schistosoma mansoni]
Contig3844_631	1.36	2.1	22-23	1	>lcl|3945_schisto-prots domain family member 24, putative|Auto
TC19208_632	1.97	2.1	37-38	3	256068396| hypothetical protein [Schistosoma mansoni]
TC19410_461	2.27	2.1	23-24	NIL	256082013| hypothetical protein [Schistosoma mansoni]
TC18650_832	1.81	2.09	21-22	NIL	>lcl|Smp_164220 ||29310.t000001, 29310.m000055|GTP-binding protein era, putative|Schistosoma mansoni|chr unknown01|||Auto
TC13985_1415	0.98	2.08	16-17	1	>lcl|Smp_041370 ||29142.t000035, 29142.m001439|expressed protein|Schistosoma mansoni|chr unknown01|||Auto
Contig8047_564	2.63	2.07	25-26	1	>lcl|3710_schisto-prots protein|Auto
TC12144_254	1.41	2.07	24-25	3	256085379| hypothetical protein [Schistosoma mansoni]
Contig8813_1125	0.95	2.06	17-18	2	>lcl|11888_schisto-prots dolichyl-diphosphooligosaccharide--protein glycosyltransferase [EC2.4.1.119], putative|Auto
TC11518_891	1.4	2.06	21-22	1	>lcl|Smp_027870 ||29099.t000003, 29099.m000889|hypothetical protein|Schistosoma mansoni|chr unknown01|||Auto
TC14339_934	1.75	2.06	27-28	1	>lcl|Smp_153390.2 ||29200.m000689, 29200.t000032|ectonucleotidepyrophosphatase/phosphodiesterase,putative|Schistosoma mansoni|chr unknown01|||Auto
TC16924_11	1.97	2.06	27-28	4	60693076| SJCHGC06727 protein [Schistosoma japonicum]
TC15634_542	0.63	2.05	22-23	1	>lcl|Smp_153070 ||29198.m001083|hypothetical protein|Schistosoma mansoni|chr unknown01|||Auto
TC15170_305	1.64	2.05	31-32	6	>lcl|Smp_153890.1 ||29202.m001221|fgf receptor activating protein, putative|Schistosoma mansoni|chr unknown01|||Auto
TC13948_4354	1.6	2.04	23-24	1	>lcl|Smp_019790 ||29078.m000918, 29078.t000047|tyrosine kinase|Schistosoma mansoni|chr unknown01|||Auto
TC11301_614	0.94	2.03	27-28	1	256071953| hypothetical protein [Schistosoma mansoni]
TC7365_3063	1.76	2.03	27-28	NIL	256070361| hypothetical protein [Schistosoma mansoni]
TC13704_1735	0.83	2.03	39-40	2	67625709| TPA: hypothetical protein [Schistosoma mansoni]
TC14236_781	0.18	2.02	17-18	4	>lcl|Smp_089200 ||29459.t000019, 29459.m000449|multidrug resistance protein 1, 2, 3 (p glycoprotein 1, 2, 3), putative|Schistosoma mansoni|chr unknown01|||Auto
TC18813_289	0.86	2.02	22-23	2	256088996| pentatricopeptide repeat-containing protein [Schistosoma mansoni]
TC14197_645	0.71	2.02	16-17	1	56754225| SJCHGC09529 protein [Schistosoma japonicum]
TC11958_727	0.92	2.01	20-21	2	>lcl|Smp_030760 ||29108.m000598, 29108.t000003|cytochrome P450 reductase, putative|Schistosoma mansoni|chr unknown01|||Auto
Contig3187_21	1.64	2.01	36-37	3	>lcl|3621_schisto-prots proteolipid protein PLP,domain-containing|Auto
Contig6497_684	1.01	2.01	29-30	3	>lcl|11932_schisto-prots pob, putative|Auto
TC14360_149	1.39	2.01	23-24	1	256053066| strawberry notch-related [Schistosoma mansoni]
TC12854_497	1.55	2.01	20-21	5	56756519| SJCHGC03997 protein [Schistosoma japonicum]
TC11032_994	0.95	2	24-25	1	74775323| RecName: Full=Eukaryotic translation initiation factor 3 subunit M; Short=eIF3m
TC13994_1203	1.3	2	34-35	6	256088569| phosphate transporter [Schistosoma mansoni]

## Sheet: RBC effect 5Day
Systematic	3hr +RBC	5day +RBC	SS	TM	Protein Homology
Contig680_298	742.24	65.94	38-39	1	89271365| CHK1 checkpoint homolog (S. pombe) [Xenopus tropicalis]
TC12371_458	1.15	5.9	21-22	1	>lcl|Smp_027870 ||29099.t000003, 29099.m000889|hypothetical protein|Schistosoma mansoni|chr unknown01|||Auto
TC12477_696	1.38	5.75	24-25	2	1103831| elastase
TC19568_220	6.24	4.24	24-25	3	119619464| TAK1-binding protein 3, isoform CRA_b [Homo sapiens]
TC16290_208	1.46	4.03	33-34	1	>lcl|Smp_127810 ||29058.m001783|expressed protein|Schistosoma mansoni|chr unknown01|||Auto
TC18899_388	1.59	3.98	25-26	3	>lcl|Smp_171300 ||29464.m000241|hypothetical protein|Schistosoma mansoni|chr unknown01|||Auto
TC13129_448	1.37	3.91	17-18	2	256074534| hypothetical protein [Schistosoma mansoni]
TC7378_756	1.39	3.81	24-25	3	>lcl|Smp_112090 ||37717.m000010, 37717.t000001|cercarial elastase (S01 family)|Schistosoma mansoni|chr unknown05|||Auto
TC11156_662	2.31	3.81	38-39	1	256070885| hypothetical protein [Schistosoma mansoni]
TC13993_270	1.41	3.78	40-41	6	>lcl|Smp_095010 ||29616.m000302, 29616.t000010|phosphate transporter, putative|Schistosoma mansoni|chr unknown01|||Auto
TC18200_602	1.08	3.71	29-30	2	>lcl|Smp_101330 ||30511.t000001, 30511.m000031|ribosomal pseudouridine synthase, putative|Schistosoma mansoni|chr unknown01|||Auto
TC17016_294	1.85	3.7	23-24	2	4588483| SPO-1 protein [Schistosoma mansoni]
TC7378_796	1.44	3.69	24-25	3	>lcl|Smp_112090 ||37717.m000010, 37717.t000001|cercarial elastase (S01 family)|Schistosoma mansoni|chr unknown05|||Auto
TC7136_298	1.62	3.64	15-16	2	>lcl|Smp_150390.2 ||29176.t000013, 29176.m000496|expressed protein|Schistosoma mansoni|chr unknown01|||Auto
TC17514_883	1.94	3.57	16-17	1	>lcl|Smp_041370 ||29142.t000035, 29142.m001439|expressed protein|Schistosoma mansoni|chr unknown01|||Auto
TC6882_676	1.43	3.57	20-21	1	>lcl|Smp_147730 ||29162.t000064, 29162.m001026|serine-type protease inhibitor, putative|Schistosoma mansoni|chr unknown01|||Auto
TC14368_704	1.79	3.53	16-17	2	>lcl|Smp_089670 ||29462.m000358, 29462.t000014|macroglobulin/complement,putative|Schistosoma mansoni|chr unknown01|||Auto
TC8263_705	2.17	3.47	31-32	3	>lcl|Smp_175660 ||29647.t000011, 29647.m000248|B-cell receptor-associated protein-like protein|Schistosoma mansoni|chr unknown01|||Auto
TC13278_458	1.39	3.44	37-38	4	256076550| bestrophin-related [Schistosoma mansoni]
TC12255_714	1.66	3.42	28-29	1	67625698| TPA: hypothetical protein [Schistosoma mansoni]
TC17657_741	1.46	3.37	28-29	3	>lcl|Smp_030030 ||29104.m001855, 29104.t000075|beta-amyloid binding protein-related|Schistosoma mansoni|chr unknown01|||Auto
TC16290_268	1.14	3.36	33-34	1	>lcl|Smp_127810 ||29058.m001783|expressed protein|Schistosoma mansoni|chr unknown01|||Auto
TC9525_321	1.46	3.3	29-30	2	>lcl|Smp_006300 ||29050.t000054, 29050.m00975|hypothetical protein|Schistosoma mansoni|chr unknown01|||Auto
TC17744_674	1.29	3.25	28-29	4	>lcl|Smp_073070 ||29293.t000026, 29293.m000846|conserved hypothetical protein|Schistosoma mansoni|chr unknown01|||Auto
TC14342_465	1.59	3.23	16-17	2	>lcl|Smp_089670 ||29462.m000358, 29462.t000014|macroglobulin/complement,putative|Schistosoma mansoni|chr unknown01|||Auto
TC9229_540	1.29	3.23	33-34	1	>lcl|Smp_162300 ||29297.m000674, 29297.t000033|matrix metallopeptidase-9 (M10 family)|Schistosoma mansoni|chr unknown01|||Auto
TC14342_485	1.58	3.23	16-17	2	>lcl|Smp_089670 ||29462.m000358, 29462.t000014|macroglobulin/complement,putative|Schistosoma mansoni|chr unknown01|||Auto
TC11583_676	2.19	3.21	23-24	1	>lcl|Smp_133710 ||29081.m001369, 29081.t000070|importin 7,, putative|Schistosoma mansoni|chr unknown01|||Auto
Contig3431_223	2.56	3.2	26-27	1	>lcl|12250_schisto-prots strictosidine synthase [EC4.3.3.2], putative|Auto
TC16677_655	0.16	3.18	25-26	1	>lcl|Smp_136220 ||29092.m00611|hypothetical protein|Schistosoma mansoni|chr unknown01|||Auto
TC13993_310	1.25	3.18	40-41	6	>lcl|Smp_095010 ||29616.m000302, 29616.t000010|phosphate transporter, putative|Schistosoma mansoni|chr unknown01|||Auto
TC17016_208	1.61	3.17	23-24	2	4588483| SPO-1 protein [Schistosoma mansoni]
TC19591_497	1.77	3.16	44-45	1	>lcl|Smp_140460 ||29116.m001807, 29116.t000067|expressed protein|Schistosoma mansoni|chr unknown01|||Auto
Contig4907_694	0.91	3.09	22-23	1	56757777| SJCHGC04334 protein [Schistosoma japonicum]
TC7075_1600	0.27	3.07	34-35	2	256082597| hypothetical protein [Schistosoma mansoni]
TC12255_674	1.41	3.07	28-29	1	67625698| TPA: hypothetical protein [Schistosoma mansoni]
TC9269_538	1.76	3.06	20-21	1	>lcl|Smp_158140 ||29252.t000002, 29252.m000270|prokaryotic DNA topoisomerase, putative|Schistosoma mansoni|chr unknown01|||Auto
TC13136_298	1.29	3.04	17-18	1	>lcl|Smp_003340 ||29046.m002672, 29046.t000058|expressed protein|Schistosoma mansoni|chr unknown01|||Auto
TC18037_387	1.32	3	37-38	1	>lcl|Smp_005500 ||29048.t000082, 29048.m001496|n-acetylgalactosaminyltransferase,putative|Schistosoma mansoni|chr unknown01|||Auto
TC7599_2785	1.5	2.99	24-25	6	>lcl|Smp_012440 ||29061.t000083, 29061.m001309|glucose transport protein, putative|Schistosoma mansoni|chr unknown01|||Auto
Contig4106_589	1.92	2.99	19-20	2	56759000| SJCHGC05632 protein [Schistosoma japonicum]
TC8786_865	2.1	2.96	22-23	NIL	>lcl|Smp_065650 ||29242.t000032, 29242.m000852|Co-chaperone protein HscB, mitochondrial precursor (Hsc20), putative|Schistosoma mansoni|chr unknown01|||Auto
TC7599_2825	1.4	2.95	24-25	6	>lcl|Smp_012440 ||29061.t000083, 29061.m001309|glucose transport protein, putative|Schistosoma mansoni|chr unknown01|||Auto
TC6882_798	0.77	2.95	20-21	1	>lcl|Smp_147730 ||29162.t000064, 29162.m001026|serine-type protease inhibitor, putative|Schistosoma mansoni|chr unknown01|||Auto
TC19591_540	1.5	2.91	44-45	1	>lcl|Smp_140460 ||29116.m001807, 29116.t000067|expressed protein|Schistosoma mansoni|chr unknown01|||Auto
TC7504_142	1.77	2.91	28-29	1	>lcl|Smp_049600.4 ||29167.t000069, 29167.m001400|DNAj (hsp40) homolog, subfamily C, member, putative|Schistosoma mansoni|chr unknown01|||Auto
TC15022_747	2.67	2.9	32-33	1	>lcl|Smp_158900 ||29261.t000017, 29261.m000429|hypothetical protein|Schistosoma mansoni|chr unknown01|||Auto
TC10718_1085	1.79	2.89	25-26	1	>lcl|Smp_194050 ||48031.m000105, 48031.t000006|Clumping factor A precursor (Fibrinogen-binding protein A) (Fibrinogen receptor A), putative|Schistosoma mansoni|chr unknown10|||Auto
TC15767_531	1.21	2.88	25-26	1	>lcl|Smp_060940.1 ||29220.t000021, 29220.m000573|protein kinase|Schistosoma mansoni|chr unknown01|||Auto
TC18813_289	1.56	2.88	22-23	2	256088996| pentatricopeptide repeat-containing protein [Schistosoma mansoni]
TC8108_600	1.8	2.87	38-39	2	60698386| SJCHGC09268 protein [Schistosoma japonicum]
TC18675_706	1.18	2.85	25-26	2	>lcl|Smp_146250 ||29152.t000006, 29152.m000334|alpha-l-fucosidase,putative|Schistosoma mansoni|chr unknown01|||Auto
Contig5608_722	1.58	2.83	16-17	1	>lcl|4576_schisto-prots protein B precursor, putative|Auto
TC7549_756	1.63	2.83	20-21	2	>lcl|Smp_024580.2 ||29090.t000017, 29090.m001590|mannosyl-oligosaccharide glucosidase, putative|Schistosoma mansoni|chr unknown01|||Auto
Contig7316_999	0.86	2.83	22-23	2	>lcl|11490_schisto-prots protein disulfide-isomerase [EC5.3.4.1], putative|Auto
TC7059_510	1.64	2.82	28-29	3	454258| unnamed protein product [Schistosoma mansoni]
TC18759_84	1.6	2.81	33-34	4	>lcl|Smp_143830 |fat1|29138.m000794, 29138.t000028|FFA transport protein, putative|Schistosoma mansoni|chr unknown01|||Auto
TC16924_11	1.83	2.8	27-28	4	60693076| SJCHGC06727 protein [Schistosoma japonicum]
TC17743_358	1.1	2.78	28-29	4	>lcl|Smp_073070 ||29293.t000026, 29293.m000846|conserved hypothetical protein|Schistosoma mansoni|chr unknown01|||Auto
TC15767_491	1.22	2.78	25-26	1	>lcl|Smp_060940.1 ||29220.t000021, 29220.m000573|protein kinase|Schistosoma mansoni|chr unknown01|||Auto
TC16884_507	0.54	2.77	15-16	NIL	256081142| hypothetical protein [Schistosoma mansoni]
Contig8715_594	0.86	2.75	16-17	5	>lcl|11811_schisto-prots protein|Auto
TC7767_1157	1.76	2.74	37-38	3	256073366| prominin (prom) protein [Schistosoma mansoni]
TC16915_2	1.31	2.74	31-32	2	29841020| SJCHGC02103 protein [Schistosoma japonicum]
TC7664_998	1.93	2.73	24-25	2	>lcl|Smp_173830 ||29601.t000002, 29601.m000080|putative homeodomain transcription factor (phtf)|Schistosoma mansoni|chr unknown01|||Auto
TC10613_2213	1.11	2.72	18-19	2	256090540| phosphoglucomutase [Schistosoma mansoni]
TC18892_419	1.63	2.71	28-29	1	>lcl|Smp_057860 ||29199.t000045, 29199.m000747|expressed protein|Schistosoma mansoni|chr unknown01|||Auto
TC11301_614	1.36	2.71	27-28	1	256071953| hypothetical protein [Schistosoma mansoni]
TC7662_941	1.46	2.69	24-25	2	>lcl|Smp_173830 ||29601.t000002, 29601.m000080|putative homeodomain transcription factor (phtf)|Schistosoma mansoni|chr unknown01|||Auto
TC7663_167	1.8	2.69	24-25	2	>lcl|Smp_173830 ||29601.t000002, 29601.m000080|putative homeodomain transcription factor (phtf)|Schistosoma mansoni|chr unknown01|||Auto
TC14429_1001	1.41	2.69	16-17	2	>lcl|Smp_089670 ||29462.m000358, 29462.t000014|macroglobulin/complement,putative|Schistosoma mansoni|chr unknown01|||Auto
TC10613_2273	1.4	2.67	18-19	2	256090540| phosphoglucomutase [Schistosoma mansoni]
TC7238_684	0.48	2.66	23-24	2	67625701| TPA: endonuclease-reverse transcriptase [Schistosoma mansoni]
TC18702_749	1.56	2.65	25-26	1	>lcl|Smp_004710 ||29047.m002306, 29047.t000095|hypothetical protein|Schistosoma mansoni|chr unknown01|||Auto
TC18702_709	1.61	2.65	25-26	1	>lcl|Smp_004710 ||29047.m002306, 29047.t000095|hypothetical protein|Schistosoma mansoni|chr unknown01|||Auto
TC18334_391	1.55	2.64	24-25	NIL	>lcl|Smp_007450.2 ||29052.t000073, 29052.m001485|expressed protein|Schistosoma mansoni|chr unknown01|||Auto
TC8031_830	1.08	2.64	18-19	1	>lcl|Smp_124360 ||29046.t000182, 29046.m002796|glutathione peroxidase, putative|Schistosoma mansoni|chr unknown01|||Auto
TC8031_980	1.3	2.63	18-19	1	>lcl|Smp_124360 ||29046.t000182, 29046.m002796|glutathione peroxidase, putative|Schistosoma mansoni|chr unknown01|||Auto
TC12600_541	2.14	2.63	20-21	1	>lcl|Smp_158140 ||29252.t000002, 29252.m000270|prokaryotic DNA topoisomerase, putative|Schistosoma mansoni|chr unknown01|||Auto
TC17739_685	1.1	2.63	21-22	1	>lcl|Smp_027870 ||29099.t000003, 29099.m000889|hypothetical protein|Schistosoma mansoni|chr unknown01|||Auto
TC17038_354	1.93	2.62	18-19	2	>lcl|Smp_043990.1 ||29148.t000013, 29148.m000449|basigin related|Schistosoma mansoni|chr unknown01|||Auto
Contig3909_514	1.47	2.6	48-49	1	>lcl|9867_schisto-prots protein|Auto
Contig6642_320	4.46	2.58	16-17	3	>lcl|9957_schisto-prots unnamed protein product
TC10875_565	1.6	2.58	23-24	1	>lcl|Smp_063330 ||29234.t000016, 29234.m000730|hypothetical protein|Schistosoma mansoni|chr unknown01|||Auto
TC14535_355	1.33	2.57	17-18	1	>lcl|Smp_166870 ||29366.m00214|hypothetical protein|Schistosoma mansoni|chr unknown01|||Auto
TC13704_1775	0.74	2.57	39-40	2	67625709| TPA: hypothetical protein [Schistosoma mansoni]
TC11732_592	1.44	2.55	21-22	1	>lcl|Smp_160830 ||29286.t000013, 29286.m000849|phospholipase d -related|Schistosoma mansoni|chr unknown01|||Auto
Contig4144_607	1.11	2.55	24-25	1	>lcl|2824_schisto-prots protein|Auto
TC14429_1043	1.44	2.55	16-17	2	>lcl|Smp_089670 ||29462.m000358, 29462.t000014|macroglobulin/complement,putative|Schistosoma mansoni|chr unknown01|||Auto
TC10718_1145	1.96	2.54	25-26	1	>lcl|Smp_194050 ||48031.m000105, 48031.t000006|Clumping factor A precursor (Fibrinogen-binding protein A) (Fibrinogen receptor A), putative|Schistosoma mansoni|chr unknown10|||Auto
TC10729_558	0.96	2.52	30-31	6	>lcl|Smp_007730.2 ||29053.t000019, 29053.m001209|ER lumen protein retaining receptor, putative|Schistosoma mansoni|chr unknown01|||Auto
TC10875_625	1.49	2.51	23-24	1	>lcl|Smp_063330 ||29234.t000016, 29234.m000730|hypothetical protein|Schistosoma mansoni|chr unknown01|||Auto
TC18334_524	1.39	2.5	24-25	NIL	>lcl|Smp_007450.2 ||29052.t000073, 29052.m001485|expressed protein|Schistosoma mansoni|chr unknown01|||Auto
TC16843_783	1.74	2.5	24-25	2	>lcl|Smp_002150 ||29044.m001211, 29044.t000051|subfamily S1A unassigned peptidase (S01 family)|Schistosoma mansoni|chr unknown01|||Auto
TC16470_183	1.44	2.5	29-30	3	>lcl|Smp_144360 ||29141.t000009, 29141.m001131|myelinproteolipid-related|Schistosoma mansoni|chr unknown01|||Auto
TC14360_149	1.46	2.48	23-24	1	256053066| strawberry notch-related [Schistosoma mansoni]
TC18633_1253	1.69	2.47	19-20	3	>lcl|Smp_069240 ||29274.m000356, 29274.t000016|voltage-gated potassium channel, putative|Schistosoma mansoni|chr unknown01|||Auto
TC7166_165	0.45	2.47	24-25	NIL	256084008| hypothetical protein [Schistosoma mansoni]
TC16295_298	1.51	2.47	25-26	NIL	256073603| polymyositis/scleroderma autoantigen-related [Schistosoma mansoni]
TC16843_1243	1.73	2.46	24-25	2	>lcl|Smp_002150 ||29044.m001211, 29044.t000051|subfamily S1A unassigned peptidase (S01 family)|Schistosoma mansoni|chr unknown01|||Auto
Contig8764_1191	1.43	2.46	16-17	1	>lcl|4154_schisto-prots calreticulin, putative|Auto
TC18562_466	1.51	2.46	18-19	1	56756278| SJCHGC02438 protein [Schistosoma japonicum]
TC17139_242	1.52	2.45	31-32	1	256080522| ribose-phosphate pyrophosphokinase 12 [Schistosoma mansoni]
TC13966_93	1.5	2.44	17-18	2	>lcl|Smp_127820 ||29058.t000056, 29058.m001789|expressed protein|Schistosoma mansoni|chr unknown01|||Auto
TC17743_318	1.26	2.44	28-29	4	>lcl|Smp_073070 ||29293.t000026, 29293.m000846|conserved hypothetical protein|Schistosoma mansoni|chr unknown01|||Auto
TC19486_361	1.7	2.44	24-25	NIL	>lcl|Smp_001180 ||29042.t000188|hypothetical conserved protein|Schistosoma mansoni|chr unknown01|||Auto
TC19501_247	1.59	2.44	18-19	2	56756088| SJCHGC08054 protein [Schistosoma japonicum]
TC11732_552	1.44	2.43	21-22	1	>lcl|Smp_160830 ||29286.t000013, 29286.m000849|phospholipase d -related|Schistosoma mansoni|chr unknown01|||Auto
TC7166_81	0.28	2.42	24-25	NIL	256084008| hypothetical protein [Schistosoma mansoni]
TC7486_651	1.67	2.42	18-19	2	256079917| heat shock protein 16 [Schistosoma mansoni]
TC19501_207	1.62	2.42	18-19	2	56756088| SJCHGC08054 protein [Schistosoma japonicum]
Contig6497_684	1.56	2.41	29-30	3	>lcl|11932_schisto-prots pob, putative|Auto
TC16926_518	0.32	2.41	31-32	1	256065161| hypothetical protein [Schistosoma mansoni]
TC19666_609	0.27	2.41	15-16	1	256092362| hypothetical protein [Schistosoma mansoni]
TC8002_532	0.4	2.41	20-21	1	256083856| hypothetical protein [Schistosoma mansoni]
TC18771_675	1.48	2.4	18-19	2	>lcl|Smp_073280 ||29293.m000875, 29293.t000055|expressed protein|Schistosoma mansoni|chr unknown01|||Auto
TC7335_61	1.9	2.4	29-30	1	>lcl|Smp_179360 ||30943.m000024, 30943.t000001|sortilin, putative|Schistosoma mansoni|chr unknown01||Partial|Auto
TC9584_279	2.12	2.39	28-29	1	>lcl|Smp_042120 ||29143.t000056, 29143.m001897|expressed protein|Schistosoma mansoni|chr unknown01|||Auto
TC9884_324	2.04	2.38	24-25	NIL	>lcl|Smp_001180 ||29042.t000188|hypothetical conserved protein|Schistosoma mansoni|chr unknown01|||Auto
TC17766_541	1.61	2.38	21-22	1	>lcl|Smp_160830 ||29286.t000013, 29286.m000849|phospholipase d -related|Schistosoma mansoni|chr unknown01|||Auto
TC7486_691	2.03	2.38	18-19	2	256079917| heat shock protein 16 [Schistosoma mansoni]
TC14544_325	2.27	2.38	31-32	2	256085332| hypothetical protein [Schistosoma mansoni]
Contig6191_621	1.59	2.37	18-19	2	56757005| SJCHGC06342 protein [Schistosoma japonicum]
TC13574_82	1.61	2.36	33-34	4	>lcl|Smp_017430 ||29074.t000002, 29074.m000921|tetraspanin, putative|Schistosoma mansoni|chr unknown01|||Auto
TC11374_597	1.26	2.36	19-20	2	>lcl|Smp_096840 ||29640.m000127, 29640.t000002|expressed protein|Schistosoma mansoni|chr unknown01|||Auto
TC7031_942	0.87	2.36	27-28	2	67625706| TPA: hypothetical protein [Schistosoma mansoni]
TC10353_1861	1.23	2.36	18-19	NIL	160925| A.1.12/9 antigen
TC17831_553	1.45	2.35	31-32	1	>lcl|Smp_000820.1 ||29042.t000131, 29042.m003568|hypothetical protein|Schistosoma mansoni|chr unknown01|||Auto
TC17831_513	1.58	2.35	31-32	1	>lcl|Smp_000820.1 ||29042.t000131, 29042.m003568|hypothetical protein|Schistosoma mansoni|chr unknown01|||Auto
Contig4046_817	0.21	2.35	18-19	4	56756338| SJCHGC03083 protein [Schistosoma japonicum]
Contig2946_718	1.9	2.34	19-20	4	>lcl|13351_schisto-prots of unknown function DUF389;IPR013031,Conserved hypothetical protein 341,domain-containing|Auto
TC16282_439	1.71	2.34	15-16	1	>lcl|Smp_142190 ||29128.m000488|carboxypeptidase N (M14 family)|Schistosoma mansoni|chr unknown01|||Auto
TC16470_93	1.29	2.34	29-30	3	>lcl|Smp_144360 ||29141.t000009, 29141.m001131|myelinproteolipid-related|Schistosoma mansoni|chr unknown01|||Auto
TC13711_932	1.5	2.33	23-24	3	56754527| SJCHGC05480 protein [Schistosoma japonicum]
TC16960_192	1.92	2.32	20-21	5	>lcl|Smp_102510 ||30909.m000045, 30909.t000002|peripheral-type benzodiazepine receptor, putative|Schistosoma mansoni|chr unknown01|||Auto
TC10495_216	1.29	2.31	17-18	1	>lcl|Smp_103610 ||31005.t000003, 31005.m000051|cathepsin B-like peptidase (C01 family)|Schistosoma mansoni|chr unknown01|||Auto
TC19257_378	0.66	2.31	26-27	1	256080397| hypothetical protein [Schistosoma mansoni]
Contig5392_935	1.56	2.31	18-19	2	256066569| peter pan-related [Schistosoma mansoni]
TC18500_164	1.53	2.3	15-16	3	>lcl|Smp_027040 ||29096.t000039, 29096.m000795|expressed protein|Schistosoma mansoni|chr unknown01|||Auto
TC7506_269	1.3	2.29	28-29	1	>lcl|Smp_049600.4 ||29167.t000069, 29167.m001400|DNAj (hsp40) homolog, subfamily C, member, putative|Schistosoma mansoni|chr unknown01|||Auto
TC12600_590	1.89	2.28	20-21	1	>lcl|Smp_158140 ||29252.t000002, 29252.m000270|prokaryotic DNA topoisomerase, putative|Schistosoma mansoni|chr unknown01|||Auto
TC7504_243	1.52	2.27	28-29	1	>lcl|Smp_049600.4 ||29167.t000069, 29167.m001400|DNAj (hsp40) homolog, subfamily C, member, putative|Schistosoma mansoni|chr unknown01|||Auto
Contig3597_1035	1.6	2.27	21-22	1	76156140| SJCHGC06409 protein [Schistosoma japonicum]
TC16924_378	1.67	2.27	27-28	4	60693076| SJCHGC06727 protein [Schistosoma japonicum]
TC10506_1270	1.47	2.26	17-18	3	>lcl|Smp_173390 ||29582.m000162|ribosomal protein L5, putative|Schistosoma mansoni|chr unknown01|||Auto
TC13711_824	1.57	2.26	23-24	3	56754527| SJCHGC05480 protein [Schistosoma japonicum]
TC8212_713	1.75	2.25	22-23	1	>lcl|Smp_156070 ||29232.m000427, 29232.t000001|expressed protein|Schistosoma mansoni|chr unknown01|||Auto
TC17766_639	1.19	2.24	21-22	1	>lcl|Smp_160830 ||29286.t000013, 29286.m000849|phospholipase d -related|Schistosoma mansoni|chr unknown01|||Auto
TC11755_201	1.48	2.23	17-18	1	>lcl|Smp_003340 ||29046.m002672, 29046.t000058|expressed protein|Schistosoma mansoni|chr unknown01|||Auto
TC15282_588	1.28	2.23	33-34	1	67625710| TPA: endonuclease-reverse transcriptase [Schistosoma mansoni]
TC17389_1229	1.48	2.22	33-34	7	>lcl|Smp_158600 ||29259.m000467, 29259.t000001|oligosaccharyl transferase, putative|Schistosoma mansoni|chr unknown01|||Auto
TC19433_527	1.57	2.22	22-23	5	256089439| synoviolin [Schistosoma mansoni]
TC12496_638	3.44	2.21	41-42	3	>lcl|Smp_173120 ||29559.t000004, 29559.m000054|phosphatidic acid phosphatase type 2-related|Schistosoma mansoni|chr unknown01|||Auto
TC17739_594	0.88	2.21	21-22	1	>lcl|Smp_027870 ||29099.t000003, 29099.m000889|hypothetical protein|Schistosoma mansoni|chr unknown01|||Auto
Contig3148_232	1.18	2.21	26-27	3	74004150| PREDICTED: similar to thioesterase superfamily member 2 [Canis familiaris]
TC10729_700	1.88	2.2	30-31	6	>lcl|Smp_007730.2 ||29053.t000019, 29053.m001209|ER lumen protein retaining receptor, putative|Schistosoma mansoni|chr unknown01|||Auto
TC17221_451	1.44	2.2	22-23	1	>lcl|Smp_143980 ||29139.m000936, 29139.t000022|expressed protein|Schistosoma mansoni|chr unknown01|||Auto
TC9884_380	1.96	2.2	24-25	NIL	>lcl|Smp_001180 ||29042.t000188|hypothetical conserved protein|Schistosoma mansoni|chr unknown01|||Auto
TC16282_547	1.6	2.2	15-16	1	>lcl|Smp_142190 ||29128.m000488|carboxypeptidase N (M14 family)|Schistosoma mansoni|chr unknown01|||Auto
TC10506_1335	1.4	2.2	17-18	3	>lcl|Smp_173390 ||29582.m000162|ribosomal protein L5, putative|Schistosoma mansoni|chr unknown01|||Auto
TC15937_747	1.44	2.2	20-21	2	>lcl|Smp_022460 ||29084.t000056, 29084.m001091|hypothetical protein|Schistosoma mansoni|chr unknown01|||Auto
TC14320_651	1.46	2.2	23-24	2	>lcl|Smp_054170 ||29184.t000019, 29184.m000506|expressed protein|Schistosoma mansoni|chr unknown01|||Auto
TC15861_101	1.61	2.2	20-21	2	>lcl|Smp_148650 ||29167.m001378|expressed protein|Schistosoma mansoni|chr unknown01|||Auto
TC17442_2010	1.47	2.2	27-28	6	>lcl|Smp_105410 ||31046.m000358, 31046.t000004|glucose transport protein, putative|Schistosoma mansoni|chr unknown02|||Auto
TC10630_66	1.26	2.2	29-30	NIL	56753153| SJCHGC05978 protein [Schistosoma japonicum]
TC19684_267	0.33	2.2	26-27	2	256052541| hypothetical protein [Schistosoma mansoni]
TC8002_424	0.28	2.2	20-21	1	256083856| hypothetical protein [Schistosoma mansoni]
TC14360_103	1.09	2.2	23-24	1	256053066| strawberry notch-related [Schistosoma mansoni]
TC8169_615	1.42	2.19	33-34	1	>lcl|Smp_127810 ||29058.m001783|expressed protein|Schistosoma mansoni|chr unknown01|||Auto
TC10367_295	1.95	2.19	18-19	1	>lcl|Smp_128610 ||29061.m001251, 29061.t000025|cytochrome-c oxidase|Schistosoma mansoni|chr unknown01|||Auto
Contig6705_344	1.25	2.19	28-29	4	256083626| hypothetical protein [Schistosoma mansoni]
TC11374_557	1.47	2.18	19-20	2	>lcl|Smp_096840 ||29640.m000127, 29640.t000002|expressed protein|Schistosoma mansoni|chr unknown01|||Auto
TC14836_649	0.92	2.18	31-32	1	256074682| hypothetical protein [Schistosoma mansoni]
TC19214_51	0.68	2.18	23-24	NIL	256090376| egg protein CP391S-like [Schistosoma mansoni]
TC7525_584	1.74	2.17	20-21	1	>lcl|Smp_042690 ||29144.t000045, 29144.m002250|hypothetical protein|Schistosoma mansoni|chr unknown01|||Auto
TC7136_347	0.31	2.17	15-16	2	>lcl|Smp_150390.2 ||29176.t000013, 29176.m000496|expressed protein|Schistosoma mansoni|chr unknown01|||Auto
TC14179_450	1.86	2.16	14-15	1	>lcl|Smp_172070 ||29472.t000013, 29472.m000479|immunoglobulin domain superfamily (sensory guidance protein), putative|Schistosoma mansoni|chr unknown01|||Auto
TC11061_314	1.34	2.16	23-24	1	>lcl|Smp_009230 ||29056.t000003, 29056.m001210|expressed protein|Schistosoma mansoni|chr unknown01|||Auto
TC8396_928	1.33	2.16	16-17	1	256088049| hypothetical protein [Schistosoma mansoni]
TC15265_406	0.2	2.16	29-30	1	67625701| TPA: endonuclease-reverse transcriptase [Schistosoma mansoni]
TC7059_673	1.31	2.16	28-29	3	454258| unnamed protein product [Schistosoma mansoni]
TC17221_386	1.56	2.15	22-23	1	>lcl|Smp_143980 ||29139.m000936, 29139.t000022|expressed protein|Schistosoma mansoni|chr unknown01|||Auto
TC10552_176	1.68	2.15	27-28	1	>lcl|Smp_080370.2 ||29343.m000253, 29343.t000001|expressed protein|Schistosoma mansoni|chr unknown01|||Auto
TC7571_2050	1.73	2.15	25-26	NIL	>lcl|Smp_014780.1 ||29066.t000061, 29066.m001362|alpha-actinin, putative|Schistosoma mansoni|chr unknown01|||Auto
TC8308_1155	1.47	2.15	18-19	NIL	256071351| methionine-tRNA synthetase [Schistosoma mansoni]
TC11346_965	2.1	2.14	23-24	1	>lcl|Smp_167690 ||29373.m000596|ubiquitin-protein ligase, putative|Schistosoma mansoni|chr unknown01|||Auto
TC18562_30	1.43	2.14	18-19	1	56756278| SJCHGC02438 protein [Schistosoma japonicum]
TC10290_426	1.95	2.14	20-21	1	256079941| supervillin [Schistosoma mansoni]
TC15951_569	1.23	2.14	23-24	2	256082591| beta-14-galactosyltransferase [Schistosoma mansoni]
TC11785_666	1.41	2.13	41-42	4	>lcl|Smp_150210.1 ||29173.m000259, 29173.t000010|autocrine motility factor receptor, amfr, putative|Schistosoma mansoni|chr unknown01|||Auto
TC7663_108	1.79	2.13	24-25	2	>lcl|Smp_173830 ||29601.t000002, 29601.m000080|putative homeodomain transcription factor (phtf)|Schistosoma mansoni|chr unknown01|||Auto
TC8289_718	1.59	2.13	15-16	NIL	>lcl|Smp_154610.2 ||29218.m000435|expressed protein|Schistosoma mansoni|chr unknown01|||Auto
TC9353_661	1.06	2.13	23-24	1	>lcl|Smp_020000 ||29079.m02527, 29079.t00112|expressed protein|Schistosoma mansoni|chr unknown01|||Auto
TC19257_325	0.43	2.13	26-27	1	256080397| hypothetical protein [Schistosoma mansoni]
Contig5125_1049	0.65	2.13	37-38	3	76162536| SJCHGC03653 protein [Schistosoma japonicum]
TC7872_1247	0.94	2.13	24-25	2	256074805| rna 3 terminal phosphate cyclase [Schistosoma mansoni]
TC11755_241	1.5	2.12	17-18	1	>lcl|Smp_003340 ||29046.m002672, 29046.t000058|expressed protein|Schistosoma mansoni|chr unknown01|||Auto
TC14320_693	1.55	2.12	23-24	2	>lcl|Smp_054170 ||29184.t000019, 29184.m000506|expressed protein|Schistosoma mansoni|chr unknown01|||Auto
TC16568_847	0.23	2.12	17-18	2	>lcl|Smp_110400.1 ||36102.t000001, 36102.m000009|expressed protein|Schistosoma mansoni|chr unknown04|||Auto
TC9229_509	1.08	2.12	33-34	1	>lcl|Smp_162300 ||29297.m000674, 29297.t000033|matrix metallopeptidase-9 (M10 family)|Schistosoma mansoni|chr unknown01|||Auto
TC9422_380	1.57	2.12	19-20	3	149773519| TM2 domain containing 1 precursor [Danio rerio]
TC10232_419	1.5	2.12	29-30	1	256083675| gamma-tubulin complex component 3 (gcp-3) [Schistosoma mansoni]
TC9393_572	0.41	2.11	20-21	2	>lcl|Smp_133700 ||29081.t000064, 29081.m001363|udp-glucoseglycoprotein:glucosyltransferase,putative|Schistosoma mansoni|chr unknown01|||Auto
TC18820_466	1.39	2.11	18-19	1	>lcl|Smp_026930 ||29096.t000024, 29096.m000780|alpha-1,3-mannosyl-glycoprotein beta-1, 2-n-acetylglucosaminyltransferase, putative|Schistosoma mansoni|chr unknown01|||Auto
TC9353_742	1.25	2.11	23-24	1	>lcl|Smp_020000 ||29079.m02527, 29079.t00112|expressed protein|Schistosoma mansoni|chr unknown01|||Auto
TC10552_256	3.57	2.11	27-28	1	>lcl|Smp_080370.2 ||29343.m000253, 29343.t000001|expressed protein|Schistosoma mansoni|chr unknown01|||Auto
TC10246_474	1.33	2.11	23-24	2	>lcl|Smp_145900 ||29149.t000008, 29149.m000390|dihydroceramidedesaturase|Schistosoma mansoni|chr unknown01|||Auto
TC13574_102	1.41	2.11	33-34	4	>lcl|Smp_017430 ||29074.t000002, 29074.m000921|tetraspanin, putative|Schistosoma mansoni|chr unknown01|||Auto
TC16719_2653	0.17	2.11	18-19	3	256048746| hypothetical protein [Schistosoma mansoni]
TC14197_645	1.41	2.11	16-17	1	56754225| SJCHGC09529 protein [Schistosoma japonicum]
TC13278_498	1.52	2.11	37-38	4	256076550| bestrophin-related [Schistosoma mansoni]
TC7722_1238	1.48	2.09	32-33	6	>lcl|Smp_075860.2 ||29302.m000609, 29302.t000018|60S ribosomal protein L35, putative|Schistosoma mansoni|chr unknown01|||Auto
TC7549_716	1.36	2.09	20-21	2	>lcl|Smp_024580.2 ||29090.t000017, 29090.m001590|mannosyl-oligosaccharide glucosidase, putative|Schistosoma mansoni|chr unknown01|||Auto
TC13716_539	1.7	2.09	23-24	1	>lcl|Smp_147120 ||29159.m000821|expressed protein|Schistosoma mansoni|chr unknown01|||Auto
TC13335_210	1.93	2.09	22-23	5	>lcl|Smp_145980.2 ||29149.m000405, 29149.t000023|sodium/dicarboxylatesymporter-related|Schistosoma mansoni|chr unknown01|||Auto
TC7507_1016	1.54	2.08	28-29	1	>lcl|Smp_049600.4 ||29167.t000069, 29167.m001400|DNAj (hsp40) homolog, subfamily C, member, putative|Schistosoma mansoni|chr unknown01|||Auto
TC11061_274	1.23	2.08	23-24	1	>lcl|Smp_009230 ||29056.t000003, 29056.m001210|expressed protein|Schistosoma mansoni|chr unknown01|||Auto
TC18621_607	1.76	2.08	21-22	1	>lcl|Smp_129720 ||29064.m000887, 29064.t000052|fuse-binding protein-interacting repressor siahbp1, putative|Schistosoma mansoni|chr unknown01|||Auto
TC7662_879	1.2	2.08	24-25	2	>lcl|Smp_173830 ||29601.t000002, 29601.m000080|putative homeodomain transcription factor (phtf)|Schistosoma mansoni|chr unknown01|||Auto
TC11464_47	1.28	2.08	18-19	2	93009102| ring box protein [Schistosoma mansoni]
TC17385_353	0.63	2.08	21-22	5	256052216| dynein heavy chain [Schistosoma mansoni]
TC19056_339	1.37	2.07	16-17	1	>lcl|Smp_173610 ||29595.m000185, 29595.t000001|expressed protein|Schistosoma mansoni|chr unknown01|||Auto
TC11211_1157	1.73	2.07	27-28	NIL	>lcl|Smp_142630 ||29131.t000035, 29131.m000676|talin 2 , putative|Schistosoma mansoni|chr unknown01|||Auto
TC7391_1213	1.98	2.07	22-23	2	170581816| AMP-binding enzyme family protein [Brugia malayi]
TC16884_547	0.68	2.07	15-16	NIL	256081142| hypothetical protein [Schistosoma mansoni]
TC19056_235	1.2	2.06	16-17	1	>lcl|Smp_173610 ||29595.m000185, 29595.t000001|expressed protein|Schistosoma mansoni|chr unknown01|||Auto
Contig7508_1314	1.04	2.06	20-21	1	256075733| histone-lysine n-methyltransferase suv9 [Schistosoma mansoni]
TC8308_1195	1.41	2.06	18-19	NIL	256071351| methionine-tRNA synthetase [Schistosoma mansoni]
TC8556_324	1.22	2.06	20-21	4	256076905| tetraspanin-CD63 receptor [Schistosoma mansoni]
TC16719_2716	0.27	2.06	18-19	3	256048746| hypothetical protein [Schistosoma mansoni]
TC15601_73	1.45	2.05	18-19	1	>lcl|Smp_163130 ||29303.m000584|transmembrane 9 superfamily protein member, putative|Schistosoma mansoni|chr unknown01|||Auto
TC10687_697	2.3	2.05	19-20	1	194217622| PREDICTED: similar to DNA-directed RNA polymerase II subunit RPB1 (RNA polymerase II subunit B1) (DNA-directed RNA polymerase II subunit A) (DNA-directed RNA polymerase III largest subunit) [Equus caballus]
TC17398_842	1.36	2.04	35-36	1	>lcl|Smp_128670 ||29061.t000038, 29061.m001264|tyrosine kinase|Schistosoma mansoni|chr unknown01|||Auto
TC15170_305	1.39	2.04	31-32	6	>lcl|Smp_153890.1 ||29202.m001221|fgf receptor activating protein, putative|Schistosoma mansoni|chr unknown01|||Auto
TC14197_805	1.36	2.04	16-17	1	56754225| SJCHGC09529 protein [Schistosoma japonicum]
TC8350_881	1.96	2.03	33-34	1	256074906| hypothetical protein [Schistosoma mansoni]
TC14332_204	1.42	2.02	35-36	7	>lcl|Smp_140510 ||29116.m001865|transmembrane protein 56 , putative|Schistosoma mansoni|chr unknown01|||Auto
TC13008_226	1.45	2.02	20-21	2	>lcl|Smp_177000 ||29671.t000010, 29671.m000719|expressed protein|Schistosoma mansoni|chr unknown01|||Auto
TC15219_257	1.18	2.02	22-23	1	>lcl|Smp_134250 ||29085.m001107, 29085.t000006|heparan sulfate n-deacetylase/n-sulfotransferase, putative|Schistosoma mansoni|chr unknown01|||Auto
TC11346_888	1.17	2.02	23-24	1	>lcl|Smp_167690 ||29373.m000596|ubiquitin-protein ligase, putative|Schistosoma mansoni|chr unknown01|||Auto
TC10894_534	1.3	2.02	28-29	1	256084107| proline synthetase associated protein [Schistosoma mansoni]
Contig3597_995	1.62	2.02	21-22	1	76156140| SJCHGC06409 protein [Schistosoma japonicum]
Contig8572_1476	1.07	2.01	23-24	1	>lcl|6936_schisto-prots putative|Auto
TC10924_668	0.24	2.01	23-24	2	44829167| TPA_exp: pol polyprotein [Schistosoma mansoni]
TC13889_370	1.33	2.01	16-17	1	256079375| ATP synthase alpha subunit vacuolar [Schistosoma mansoni]
TC15170_265	1.56	2	31-32	6	>lcl|Smp_153890.1 ||29202.m001221|fgf receptor activating protein, putative|Schistosoma mansoni|chr unknown01|||Auto
TC17695_977	2.82	2	18-19	2	>lcl|Smp_161010 ||29286.t000055, 29286.m000891|mixed-lineage leukemia 5, mll5, putative|Schistosoma mansoni|chr unknown01|||Auto
TC8289_678	1.31	2	15-16	NIL	>lcl|Smp_154610.2 ||29218.m000435|expressed protein|Schistosoma mansoni|chr unknown01|||Auto
TC7507_1076	1.45	2	28-29	1	>lcl|Smp_049600.4 ||29167.t000069, 29167.m001400|DNAj (hsp40) homolog, subfamily C, member, putative|Schistosoma mansoni|chr unknown01|||Auto
TC14448_712	1.38	2	25-26	1	256088030| shc transforming protein [Schistosoma mansoni]
TC9422_340	1.59	2	19-20	3	149773519| TM2 domain containing 1 precursor [Danio rerio]
TC8396_886	1.25	2	16-17	1	256088049| hypothetical protein [Schistosoma mansoni]

## Sheet: RBC effect 3Hr
Systematic	3hr +RBC	5day +RBC	SS	TM	Protein Homology
Contig680_298	742.24	65.94	38-39	1	89271365| CHK1 checkpoint homolog (S. pombe) [Xenopus tropicalis]
TC19568_220	6.24	4.24	24-25	3	119619464| TAK1-binding protein 3, isoform CRA_b [Homo sapiens]
TC10856_2216	6.08	1.38	17-18	1	76154276| SJCHGC04856 protein [Schistosoma japonicum]
Contig6642_320	4.46	2.58	16-17	3	>lcl|9957_schisto-prots unnamed protein product
TC16233_349	4.01	1.96	17-18	3	>lcl|Smp_173390 ||29582.m000162|ribosomal protein L5, putative|Schistosoma mansoni|chr unknown01|||Auto
TC10552_256	3.57	2.11	27-28	1	>lcl|Smp_080370.2 ||29343.m000253, 29343.t000001|expressed protein|Schistosoma mansoni|chr unknown01|||Auto
TC12496_638	3.44	2.21	41-42	3	>lcl|Smp_173120 ||29559.t000004, 29559.m000054|phosphatidic acid phosphatase type 2-related|Schistosoma mansoni|chr unknown01|||Auto
TC17695_977	2.82	2	18-19	2	>lcl|Smp_161010 ||29286.t000055, 29286.m000891|mixed-lineage leukemia 5, mll5, putative|Schistosoma mansoni|chr unknown01|||Auto
TC15022_747	2.67	2.9	32-33	1	>lcl|Smp_158900 ||29261.t000017, 29261.m000429|hypothetical protein|Schistosoma mansoni|chr unknown01|||Auto
TC11728_433	2.66	1.88	22-23	1	>lcl|Smp_160620.1 ||29284.m000446|subfamily M12B unassigned peptidase (M12 family)|Schistosoma mansoni|chr unknown01|||Auto
Contig3431_223	2.56	3.2	26-27	1	>lcl|12250_schisto-prots strictosidine synthase [EC4.3.3.2], putative|Auto
TC8235_629	2.55	1.8	29-30	2	>lcl|Smp_006300 ||29050.t000054, 29050.m00975|hypothetical protein|Schistosoma mansoni|chr unknown01|||Auto
TC12491_218	2.49	1.5	16-17	1	256071466| hypothetical protein [Schistosoma mansoni]
TC7524_290	2.36	1.2	20-21	1	>lcl|Smp_042690 ||29144.t000045, 29144.m002250|hypothetical protein|Schistosoma mansoni|chr unknown01|||Auto
TC11156_662	2.31	3.81	38-39	1	256070885| hypothetical protein [Schistosoma mansoni]
TC10687_697	2.3	2.05	19-20	1	194217622| PREDICTED: similar to DNA-directed RNA polymerase II subunit RPB1 (RNA polymerase II subunit B1) (DNA-directed RNA polymerase II subunit A) (DNA-directed RNA polymerase III largest subunit) [Equus caballus]
TC14460_1282	2.29	1.61	28-29	1	>lcl|5090_schisto-prots putative|Auto
TC14544_325	2.27	2.38	31-32	2	256085332| hypothetical protein [Schistosoma mansoni]
TC13621_1083	2.25	1.73	19-20	2	>lcl|Smp_105220 ||31044.m000198, 31044.t000005|expressed protein|Schistosoma mansoni|chr unknown02|||Auto
TC18228_925	2.25	1.59	39-40	4	>lcl|Smp_093710 ||29584.m000192, 29584.t000009|hypothetical protein|Schistosoma mansoni|chr unknown01|||Auto
Contig8047_564	2.24	1.87	25-26	1	>lcl|3710_schisto-prots protein|Auto
TC12491_178	2.24	1.68	16-17	1	256071466| hypothetical protein [Schistosoma mansoni]
Contig7639_1366	2.21	1.67	23-24	1	>lcl|9403_schisto-prots protein|Auto
TC11583_676	2.19	3.21	23-24	1	>lcl|Smp_133710 ||29081.m001369, 29081.t000070|importin 7,, putative|Schistosoma mansoni|chr unknown01|||Auto
TC8263_705	2.17	3.47	31-32	3	>lcl|Smp_175660 ||29647.t000011, 29647.m000248|B-cell receptor-associated protein-like protein|Schistosoma mansoni|chr unknown01|||Auto
TC7995_638	2.16	1.6	38-39	5	>lcl|Smp_170080 ||29449.t000023, 29449.m000429|sodium/dicarboxylatecotransporter-related|Schistosoma mansoni|chr unknown01|||Auto
TC12600_541	2.14	2.63	20-21	1	>lcl|Smp_158140 ||29252.t000002, 29252.m000270|prokaryotic DNA topoisomerase, putative|Schistosoma mansoni|chr unknown01|||Auto
TC9584_279	2.12	2.39	28-29	1	>lcl|Smp_042120 ||29143.t000056, 29143.m001897|expressed protein|Schistosoma mansoni|chr unknown01|||Auto
TC19364_737	2.12	1.68	42-43	1	56756128| SJCHGC00495 protein [Schistosoma japonicum]
TC11930_541	2.12	1.8	26-27	1	256084719| alpha adaptin carboxyl-terminal domain [Schistosoma mansoni]
TC16552_150	2.12	1.93	22-23	2	256084401| heat shock protein [Schistosoma mansoni]
TC18621_668	2.11	1.96	21-22	1	>lcl|Smp_129720 ||29064.m000887, 29064.t000052|fuse-binding protein-interacting repressor siahbp1, putative|Schistosoma mansoni|chr unknown01|||Auto
TC8786_865	2.1	2.96	22-23	NIL	>lcl|Smp_065650 ||29242.t000032, 29242.m000852|Co-chaperone protein HscB, mitochondrial precursor (Hsc20), putative|Schistosoma mansoni|chr unknown01|||Auto
TC11346_965	2.1	2.14	23-24	1	>lcl|Smp_167690 ||29373.m000596|ubiquitin-protein ligase, putative|Schistosoma mansoni|chr unknown01|||Auto
TC10878_950	2.1	1.82	19-20	2	>lcl|Smp_061310.1 ||29222.m000488, 29222.t000028|expressed protein|Schistosoma mansoni|chr unknown01|||Auto
TC14847_526	2.05	1.8	34-35	4	>lcl|Smp_044750 ||29152.t000020, 29152.m000348|marvel-containing potential lipid raft-associated protein, putative|Schistosoma mansoni|chr unknown01|||Auto
TC9884_324	2.04	2.38	24-25	NIL	>lcl|Smp_001180 ||29042.t000188|hypothetical conserved protein|Schistosoma mansoni|chr unknown01|||Auto
TC7598_1198	2.03	1.51	18-19	2	>lcl|Smp_045360.4 ||29155.m000743, 29155.t000022|expressed protein|Schistosoma mansoni|chr unknown01|||Auto
TC7486_691	2.03	2.38	18-19	2	256079917| heat shock protein 16 [Schistosoma mansoni]
TC10647_599	2.02	1.58	19-20	1	>lcl|Smp_000260 ||29042.t000054, 29042.m003491|saposin containing protein|Schistosoma mansoni|chr unknown01|||Auto
TC13331_445	2.02	1.34	17-18	1	256072565| xylosyltransferase [Schistosoma mansoni]
TC17071_22	2	1.99	16-17	NIL	>lcl|Smp_097810.2 ||29652.t000025, 29652.m000436|otubain-1 (C65 family)|Schistosoma mansoni|chr unknown01|||Auto
TC12516_628	2	1.17	19-20	NIL	>lcl|Smp_098090 ||29655.t000008, 29655.m000225|expressed protein|Schistosoma mansoni|chr unknown01|||Auto
TC14965_473	2	1.15	15-16	1	>lcl|Smp_088270 ||29451.m000291, 29451.t000001|subfamily M14A unassigned peptidase (M14 family)|Schistosoma mansoni|chr unknown01|||Auto
